# Supplementary material for: Engineering a molecular electrocatalytic system for energy-efficient ammonia production from wastewater nitrate
Source: Royal Society of Chemistry journal article supplement (doi:10.1039/d4ee01727g), 2024-01-01
Supplement: d4ee01727g1.pdf [file d4ee01727g1.pdf]

*Supplementary Information for:*

**Engineering a molecular electrocatalytic system for energy-efficient ammonia production  
from wastewater nitrate**

Dean M. Miller<sup>1</sup>, Matthew J. Liu<sup>1</sup>, Kristen Abels<sup>1</sup>, Anna Kogler<sup>2</sup>, Kindle S. Williams,<sup>1</sup> William A.  
Tarpeh<sup>1,2,3,\*</sup>

<sup>1</sup>Department of Chemical Engineering, Stanford University, Stanford, CA, 94305, United States

<sup>2</sup>Department of Civil and Environmental Engineering, Stanford University, Stanford, CA, 94305, United  
States

<sup>3</sup>Woods Institute for the Environment, Stanford University, Stanford, California 94305, United States

\*Corresponding author, Email: [wtarpeh@stanford.edu](mailto:wtarpeh@stanford.edu). Address: 443 Via Ortega, Room 387, Stanford CA,  
94305, USA. Telephone: (650) 497-1324

***65 pages***

***7 tables***

***39 figures***

***44 equations***

Submitted to: *Energy & Environmental Science*

|    |                                                                                                  |    |
|----|--------------------------------------------------------------------------------------------------|----|
| 26 |                                                                                                  |    |
| 27 | <i>Section S1: Catalyst and wastewater characterization</i>                                      | 3  |
| 28 | <i>Section S2: Cyclic voltammetry (CV)</i>                                                       | 8  |
| 29 | <i>Section S3: Controlled-potential electrolysis (CPE)</i>                                       | 10 |
| 30 | Section S3.1: Equations used to evaluate CPEs                                                    | 10 |
| 31 | Section S3.2: Aqueous characterization of CPE experiments                                        | 11 |
| 32 | Section S3.3: Post CPE characterization                                                          | 13 |
| 33 | <i>Section S4: Transport and contaminant conditions for catalysis inhibition</i>                 | 23 |
| 34 | Section S4.1: Rotating disk electrode                                                            | 23 |
| 35 | Section S4.2: Two-chamber CPE contaminant dosing experiments                                     | 26 |
| 36 | <i>Section S5: Electrocatalyst-in-a-box (ECaB)</i>                                               | 32 |
| 37 | Section S5.1: Equations used to evaluate ECaB                                                    | 32 |
| 38 | Section S5.2: Proof-of-concept ECaB pH, rates, efficiencies, and cathode characterization        | 35 |
| 39 | <i>Section S6: Donnan dialysis equilibrium calculations</i>                                      | 45 |
| 40 | Section S6.1: System of equations (ion mass balances, electroneutrality, and Donnan equilibrium) | 45 |
| 41 | <i>Section S7: ECaB process engineering and targets</i>                                          | 48 |
| 42 | Section S7.1: Subunit engineered ECaB performance                                                | 48 |
| 43 | Section S7.2: Simplified cost assessment                                                         | 53 |
| 44 | Section S7.3: ECaB for nitrite reduction (NO <sub>2</sub> RR)                                    | 55 |
| 45 | <i>References</i>                                                                                | 56 |
| 46 |                                                                                                  |    |



## 48 Section S1: Catalyst and wastewater characterization

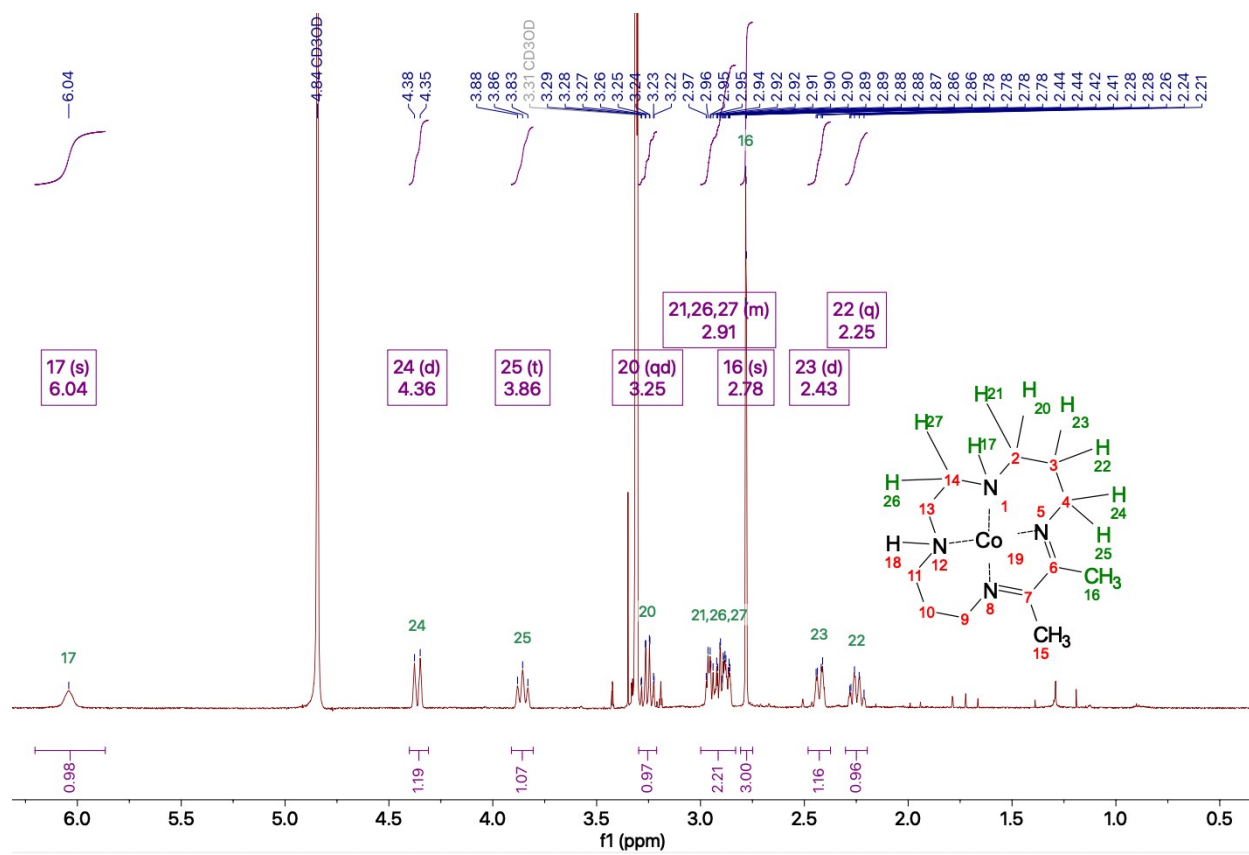

50 Fig. S1.  $^1\text{H}$  NMR of Co(DIM) in  $\text{CD}_3\text{OD}$  (deuterated methanol).

51

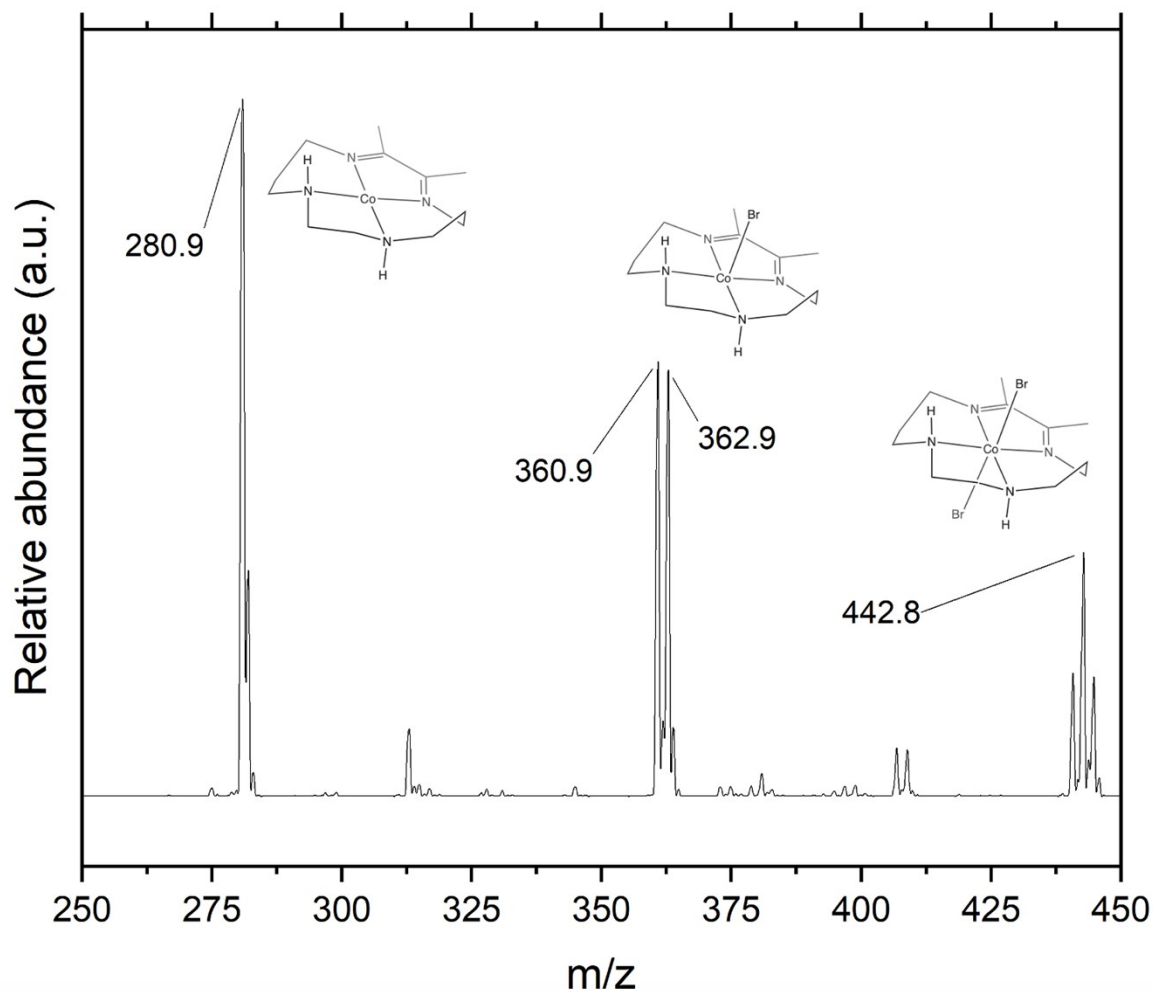

52

53 Fig. S2. Mass spectra for aqueous Co(DIM). Co(DIM) samples were prepared for high performance liquid  
 54 chromatography-mass spectrometry (HPLC-MS) analysis by diluting 1 mg/mL aqueous solutions by a  
 55 factor of 5 using a methanol/water mixture (50:50 v/v). Samples were analyzed via direct injection on an  
 56 Agilent 1260 HPLC with an Agilent 6460 Triple Quadrupole MS (Agilent, Santa Clara, CA). Samples were  
 57 eluted using 98% aqueous mobile phase (0.1% formic acid) and 2% organic mobile phase (acetonitrile) at  
 58 a flowrate of 0.6 mL/min. 10  $\mu$ L of sample were injected during each run. Compounds were detected using  
 59 positive electrospray ionization mode with a gas temperature of 300  $^{\circ}$ C, gas flowrate of 7 L/min, a nebulizer  
 60 pressure of 45 psi, a sheath gas temperature of 250  $^{\circ}$ C, a sheath gas flowrate of 9 L/min, a capillary voltage  
 61 of 3500 V, a nozzle voltage of 500 V, a fragmentor energy of 50 V, and a cell accelerator voltage of 7 V.

62 LC-MS fragment weights match reasonably well with the molecular weight of Co(DIM) bound to zero  
63  $\text{Br}^-$  ions (283.29), one  $\text{Br}^-$  ion (363.19), and two  $\text{Br}^-$  ions (443.09). Additionally,  $^{79}\text{Br}$  and  $^{81}\text{Br}$  exist in  
64 roughly equal parts naturally at standard temperature and pressure, causing the spectra to exhibit a triplet  
65 at 442.8 m/z, a doublet at 361.9 m/z, and a singlet at 280.9 m/z.

66

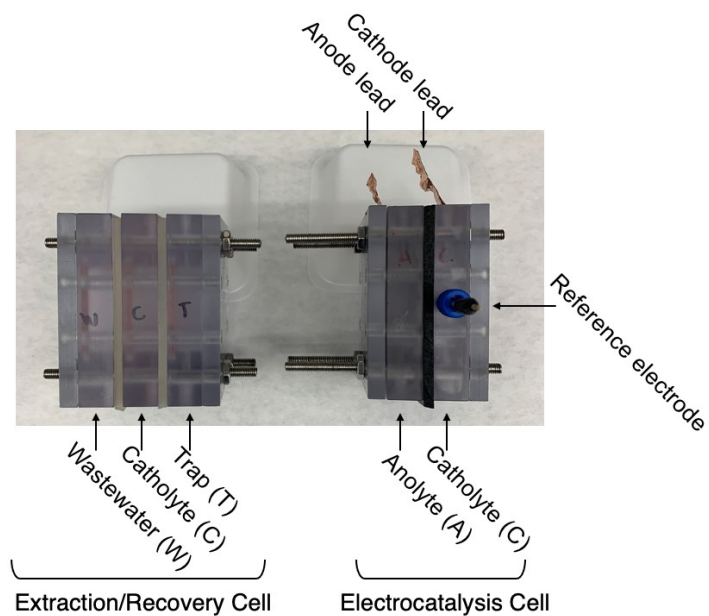

67

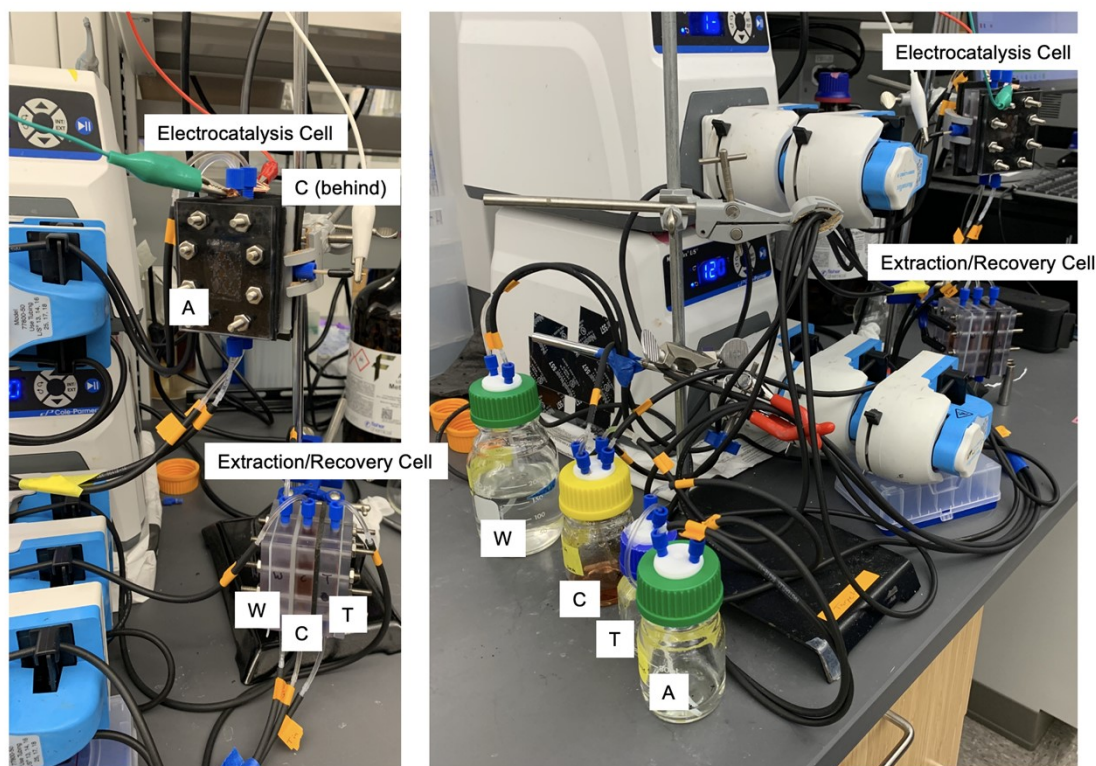

68

69 Fig. S3. Photos of electrocatalyst-in-a-box (ECaB) reactor. Top photo: ECaB reactor profile before being  
 70 plumbed with recirculation tubing. Bottom left photo: three-chamber extraction/recovery cell (bottom),  
 71 two-chamber electrocatalysis reactor (top). Bottom right photo: flow setup showing reactor system, pumps,  
 72 and batch recirculation bottles.

73 Table S1. Simplified, simulated, and real wastewater characterization.

| Species*                     | Simplified Wastewater | Simulated Wastewater | Real Wastewater |
|------------------------------|-----------------------|----------------------|-----------------|
| Nitrate                      | 28 mg-N/L             | 28 mg-N/L            | 28 mg-N/L       |
| Chloride                     | 217 mg/L              | 242 mg/L             | 228 mg/L        |
| Bicarbonate                  | -                     | 84 mg/L              | 79 mg/L         |
| Sulfate                      | -                     | 106 mg/L             | 102 mg/L        |
| Sodium                       | 52.2 mg/L             | 120 mg/L             | 120 mg/L        |
| Potassium                    | -                     | 20 mg/L              | 20 mg/L         |
| Magnesium                    | -                     | 36 mg/L              | 36 mg/L         |
| Calcium                      | -                     | 76 mg/L              | 77 mg/L         |
| pH<br>(without 8 mM Co(DIM)) | 6.50                  | 8.55                 | 8.30            |
| pH (with 8 mM Co(DIM))       | 3.06                  | 3.42                 | 3.58            |

74 \*Fluoride, nitrite, bromide, phosphate, and lithium were measures but not detected in the real wastewater  
 75 by ion chromatography.

76



## 77 Section S2: Cyclic voltammetry (CV)

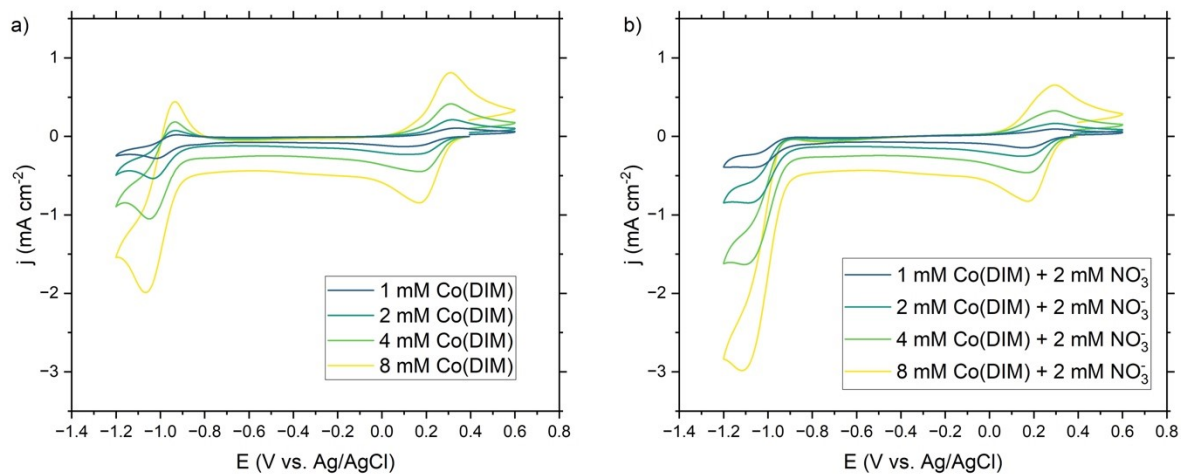

78

79 Fig. S4. a) CVs as a function of [Co(DIM)] in the absence of nitrate. b) CVs as a function of Co(DIM) with  
 80 2 mM nitrate (2 mM  $\text{NaNO}_3$ ). Working electrode: 5 mm GC disk. Counter electrode: 6.6 mm graphite rod.  
 81 Reference electrode: Ag/AgCl (4.0 M KCl). Background electrolyte: 6.2 mM NaCl.

82

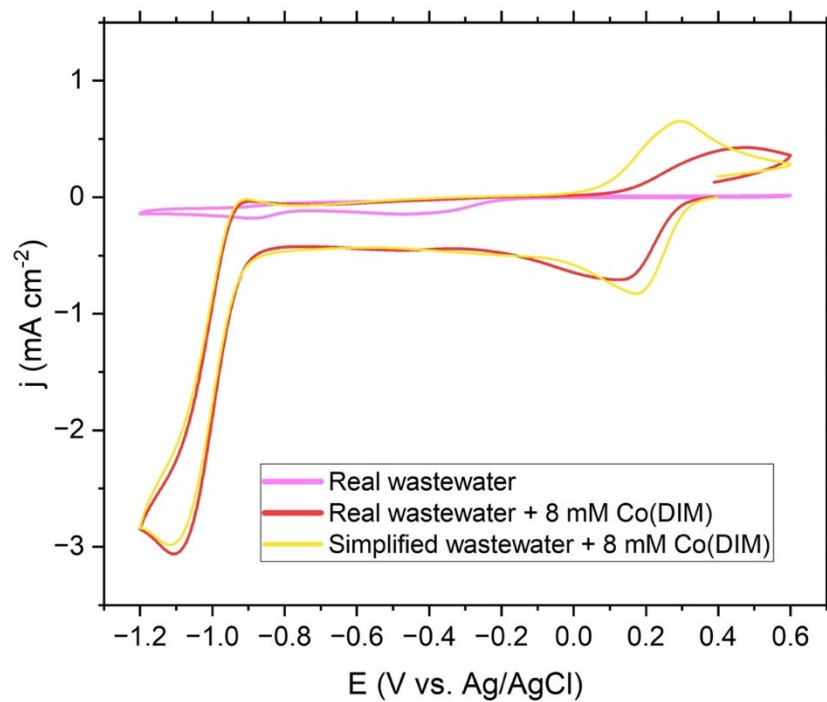

83

84 Fig. S5. CVs of 8 mM Co(DIM) in real secondary effluent wastewater and in simplified wastewater (6.2

85 mM NaCl + 2 mM NaNO<sub>3</sub>) for comparison. Working electrode: 5 mm GC disk. Counter electrode: 6.6 mm

86 graphite rod. Reference electrode: Ag/AgCl (4.0 M KCl).

87

## 88 Section S3: Controlled-potential electrolysis (CPE)

### 89 Section S3.1: Equations used to evaluate CPEs

$$90 \quad S_{TAN} = \frac{mol\ TAN_{produced}}{mol\ NO_3^-(initial) - mol\ NO_3^-(t)} \quad (Equation\ S3.1.1)$$

$$91 \quad FE\ to\ TAN\ (\%) = \left( \frac{n * F * mol\ TAN_{produced}}{Q_{passed}} \right) * 100\% \quad (Equation\ S3.1.2)$$

92 where

$$93 \quad n = \text{number of electrons (8) required to produce one mole of TAN from } NO_3^-, Q_{passed} = \text{charge passed}$$

$$94 \quad \text{and } F = 96485\ C\ mol^{-1}$$

$$95 \quad X_{NO_3^-}(t) = \frac{mol\ NO_3^-(initial) - mol\ NO_3^-(t)}{mol\ NO_3^-(initial)} \quad (Equation\ S3.1.3)$$

96

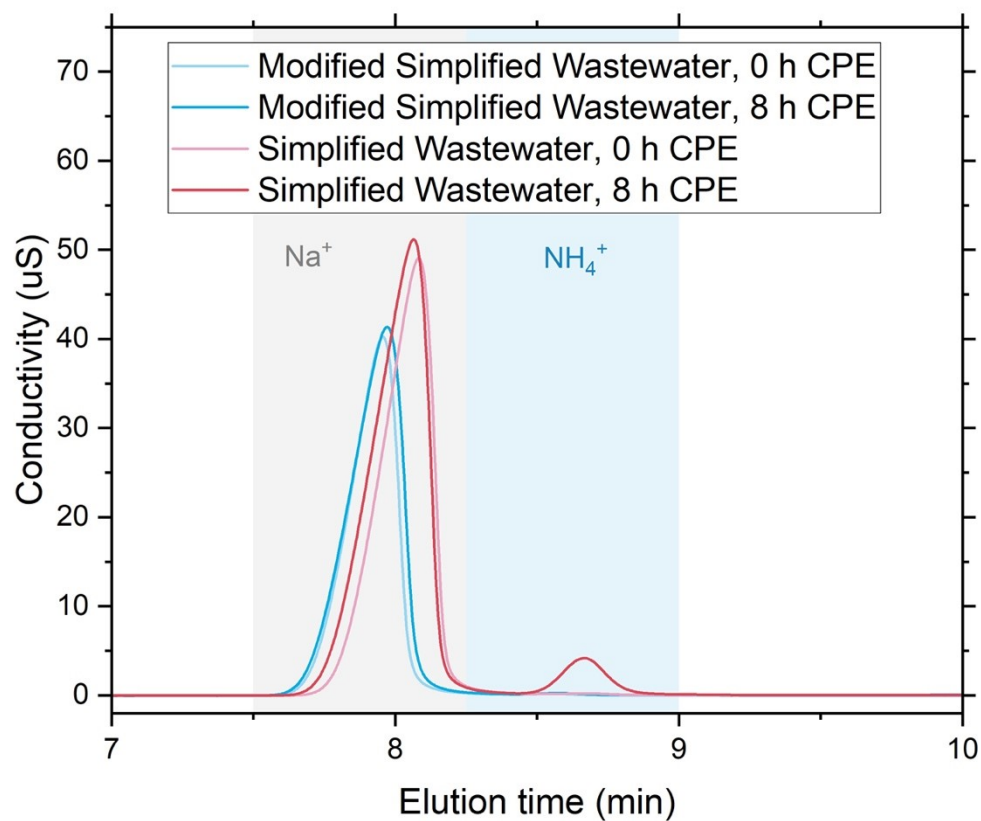

98

99 Fig. S6. Cation chromatograms of aqueous samples from CPEs in modified simplified wastewater (8 mM

100 Co(DIM) + 6.2 mM NaCl) and in simplified wastewater (8 mM Co(DIM) + 6.2 mM NaCl + 2 mM NaNO<sub>3</sub>).

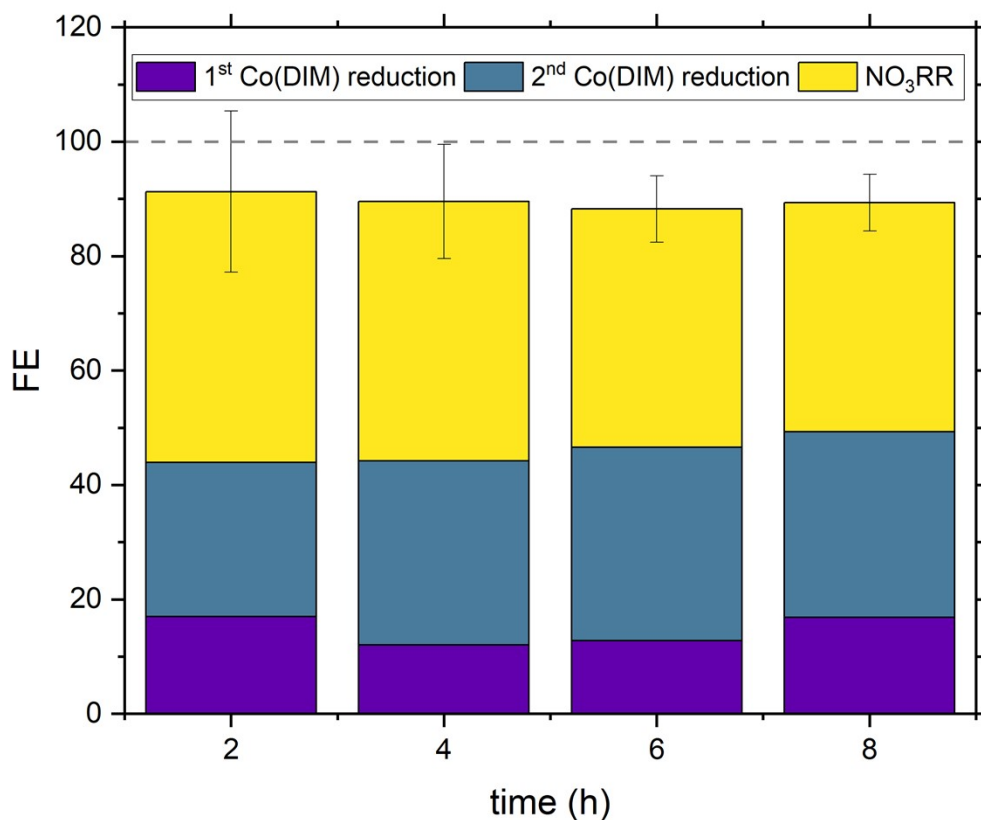

102

103 Fig. S7. Charge decomposition into the first Co(DIM) reduction, second Co(DIM) reductions, and NO<sub>3</sub>RR.

104 −1.05 V vs. Ag/AgCl applied for NO<sub>3</sub>RR (yellow; simplified wastewater: 8 mM Co(DIM) + 6.2 mM NaCl

105 + 2 mM NaNO<sub>3</sub>) and 2<sup>nd</sup> Co(DIM) reduction (green; modified simplified wastewater: 8 mM Co(DIM) +

106 6.2 mM NaCl). −0.75V vs. Ag/AgCl (−0.99 V vs. first reduction, +0.25 V vs. second reduction) applied for

107 1<sup>st</sup> Co(DIM) reduction (purple; simplified wastewater: 8 mM Co(DIM) + 6.2 mM NaCl + 2 mM NaNO<sub>3</sub>).

108 Error bars represent ± one standard deviation from triplicate experiments (n=3) for NO<sub>3</sub>RR experiments

109 (yellow; simplified wastewater: 8 mM Co(DIM) + 6.2 mM NaCl + 2 mM NaNO<sub>3</sub>). The CPE experiments

110 to quantify charge associated with non-catalytic 1<sup>st</sup> and 2<sup>nd</sup> reductions of Co(DIM) were only performed

111 once because no conversion of nitrate and no production of TAN was observed.

112

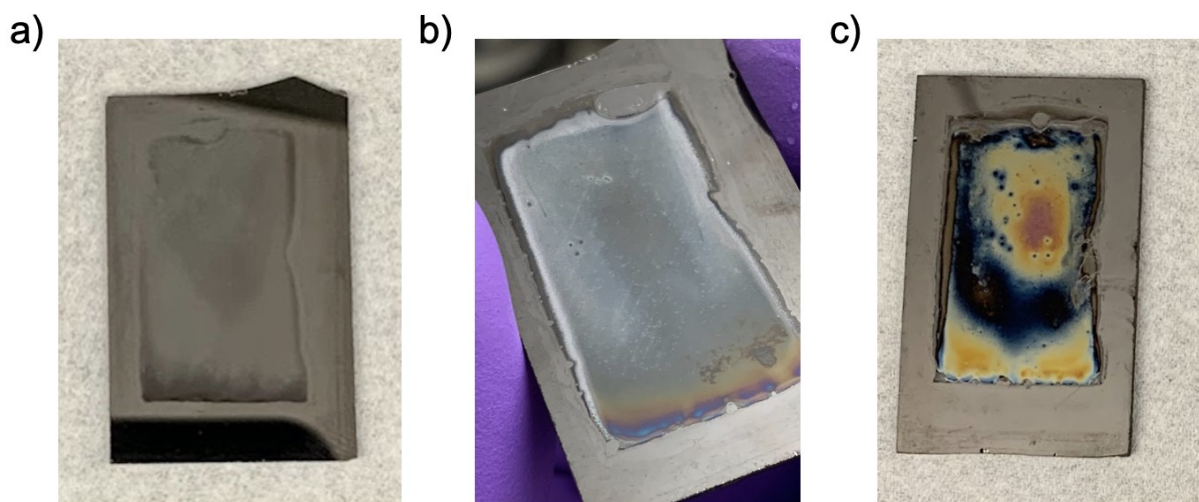

114

115 Fig. S8. Photos of GC cathodes post CPE in (a) simplified, (b) simulated, and (c) real wastewater.  $-1.05$  V  
116 vs. Ag/AgCl was held for 8 hours, then the cathode was removed, rinsed thoroughly with water, and blown  
117 dry with  $N_2$ . The anode was a  $5.4\text{ cm}^2$  MMO electrode. Leakless Ag/AgCl ( $3.4\text{ M KCl}$ ) reference electrode.  
118 Cathode and anode chambers were separated by a CEM.

119

120 Table S2. Possible precipitates from real secondary effluent wastewater.

| Possible precipitate                  | Concentration of relevant ions in real wastewater                                                                                                                                                       | K <sub>sp</sub> of precipitate <sup>1</sup>             |
|---------------------------------------|---------------------------------------------------------------------------------------------------------------------------------------------------------------------------------------------------------|---------------------------------------------------------|
| Mg(OH) <sub>2</sub>                   | $[Mg^{2+}] = 1.5 \text{ mM}$<br>$[OH^-]_{RDL} = 10^{-(14 - pH_{RDL})}$                                                                                                                                  | $5.61 \times 10^{-12}$                                  |
| MgCO <sub>3</sub>                     | $[Mg^{2+}] = 1.5 \text{ mM}$<br>$[HCO_3^-] = 1.4 \text{ mM}$<br>$[CO_3^{2-}]_{RDL} = \frac{[HCO_3^-] \times 10^{-pK_{a_{HCO_3^-/CO_3^{2-}}}}}{10^{-pH_{RDL}}}$ ;<br>$pK_{a_{HCO_3^-/CO_3^{2-}}} = 10.3$ | $6.82 \times 10^{-6}$                                   |
| MgSO <sub>4</sub> • 7H <sub>2</sub> O | $[Mg^{2+}] = 1.5 \text{ mM}$<br>$[SO_4^{2-}] = 1.1 \text{ mM}$                                                                                                                                          | <i>n.a.</i><br><i>(soluble in water up to 1.1 kg/L)</i> |
| Ca(OH) <sub>2</sub>                   | $[Ca^{2+}] = 1.9 \text{ mM}$<br>$[OH^-]_{RDL} = 10^{-(14 - pH_{RDL})}$                                                                                                                                  | $5.02 \times 10^{-6}$                                   |
| CaCO <sub>3</sub>                     | $[Ca^{2+}] = 1.9 \text{ mM}$<br>$[HCO_3^-] = 1.4 \text{ mM}$<br>$[CO_3^{2-}]_{RDL} = \frac{[HCO_3^-] \times 10^{-pK_{a_{HCO_3^-/CO_3^{2-}}}}}{10^{-pH_{RDL}}}$ ;<br>$pK_{a_{HCO_3^-/CO_3^{2-}}} = 10.3$ | $3.36 \times 10^{-9*}$                                  |
| CaSO <sub>4</sub> • 2H <sub>2</sub> O | $[Mg^{2+}] = 1.5 \text{ mM}$                                                                                                                                                                            | $3.14 \times 10^{-5}$                                   |

|  |                                |  |
|--|--------------------------------|--|
|  | $[SO_4^{2-}] = 1.1 \text{ mM}$ |  |
|--|--------------------------------|--|

121 \* $K_{sp}$  shown for  $CaCO_3$  corresponds to calcite, which has the lowest  $K_{sp}$  among possible precipitates.

122 To determine the interfacial pH required for precipitation of  $Mg(OH)_2$  we began by setting the  
123 solubility product quotient ( $Q_{sp}$ ) equal to the solubility product constant ( $K_{sp}$ ).

124 
$$Q_{sp} = [Mg^{2+}][OH^-]^2 = K_{sp} = 5.61 \times 10^{-12} \quad (\text{Equation S3.3.1})$$

125 Plugging in  $[Mg^{2+}] = 1.5 \text{ mM}$  and solving for  $[OH^-]$  yields the pH necessary for precipitation of  $Mg(OH)_2$   
126 in the RDL:  $pH_{RDL} = 9.8$ . The same procedure was used to determine the necessary pH for precipitation of  
127  $Ca(OH)_2$ :  $pH_{RDL} = 12.8$ .

128 Determining the interfacial pH required for precipitation of carbonates like  $MgCO_3$  is only slightly  
129 more complex because of the  $HCO_3^-/CO_3^{2-}$  acid/base pair, where magnesium and calcium bicarbonate are  
130 significantly more soluble than their carbonate analogues. We again set  $Q_{sp}$  equal to  $K_{sp}$ .

131 
$$Q_{sp} = [Mg^{2+}][CO_3^{2-}] = K_{sp} = 6.82 \times 10^{-6} \quad (\text{Equation S3.3.2})$$

132 Plugging in  $[Mg^{2+}] = 1.5 \text{ mM}$  and solving for  $[CO_3^{2-}]$  yields the  $[CO_3^{2-}]$  necessary for precipitation of  
133  $MgCO_3$  in the RDL: 4.5 mM. This concentration is greater than the 1.4 mM bicarbonate in bulk solution,  
134 making precipitation of  $MgCO_3$  unlikely. We performed the same procedure for  $CaCO_3$ .

135 
$$Q_{sp} = [Ca^{2+}][CO_3^{2-}] = K_{sp} = 3.36 \times 10^{-9} \quad (\text{Equation S3.3.3})$$

136 Precipitation of  $CaCO_3$  is possible because the  $[CO_3^{2-}]$  necessary is 1.8  $\mu\text{M}$ . Because the bulk pH of the

137 Real Wastewater was 8.30 <<  $pK_{a_{HCO_3^-/CO_3^{2-}}} = 10.3$ , the majority of inorganic carbon in bulk solution exists  
138 as bicarbonate. The concentration of carbonate is therefore dependent on the RDL pH assuming the  
139 acid/base pair is equilibrated by rapid proton transfer kinetics.

140 
$$10^{-pK_{a_{HCO_3^-/CO_3^{2-}}}} = \frac{[CO_3^{2-}]_{RDL} \times 10^{-pH_{RDL}}}{[HCO_3^-]_{RDL}} \quad (\text{Equation S3.3.4})$$



$$10^{-pH_{RDL}} = \frac{10^{-pK_a_{HCO_3^-/CO_3^{2-}}} \times [HCO_3^-]_{RDL}}{[CO_3^{2-}]_{RDL}} \quad (\text{Equation S3.3.5})$$

$$pH_{RDL} = -\log \left( \frac{10^{-pK_a_{HCO_3^-/CO_3^{2-}}} \times [HCO_3^-]_{RDL}}{[CO_3^{2-}]_{RDL}} \right) \quad (\text{Equation S3.3.6})$$

The unknown  $[HCO_3^-]_{RDL}$  can be eliminated by a mass balance of bicarbonate and carbonate.

$$pH_{RDL} = -\log \left( \frac{10^{-pK_a_{HCO_3^-/CO_3^{2-}}} \times (1.4 \text{ mM} - [CO_3^{2-}]_{RDL})}{[CO_3^{2-}]_{RDL}} \right) \quad (\text{Equation S3.3.7})$$

Plugging in  $[CO_3^{2-}]_{RDL} = 1.8 \text{ } \mu\text{M}$ , the RDL pH necessary for precipitation of  $\text{CaCO}_3$  is 4.4 which is less than the pH of the bulk solution. Complex aqueous solutions like the real wastewater in this study are nevertheless able to keep  $\text{Ca}^{2+}$  and  $\text{HCO}_3^-$  solvated in bulk solution.<sup>2</sup> We hypothesize that interfacial coulombic effects in Co(DIM)-mediated  $\text{NO}_3\text{RR}$  prevented  $\text{CaCO}_3$  deposition and may explain why we did not see a strong signal for calcium in XPS or EDS for any GC cathode analyzed. One such effect could be Co(DIM) axially coordinating bicarbonate/carbonate,<sup>3</sup> precluding deposition.

Finally, precipitation of magnesium as a sulfate is unlikely because the hydrate ( $\text{MgSO}_4 \cdot 7\text{H}_2\text{O}$ ) is soluble in mass fractions greater than 1:1 with water. Precipitation of  $\text{CaSO}_4 \cdot 2\text{H}_2\text{O}$  is also unlikely because the concentration of sulfate necessary (16.5 mM) exceeds the concentration in the real wastewater (1.1 mM), as shown by setting  $Q_{sp}$  equal to  $K_{sp}$  in Equation S3.3.8.

$$Q_{sp} = [Ca^{2+}][SO_4^{2-}] = K_{sp} = 3.14 \times 10^{-5} \quad (\text{Equation S3.3.8})$$

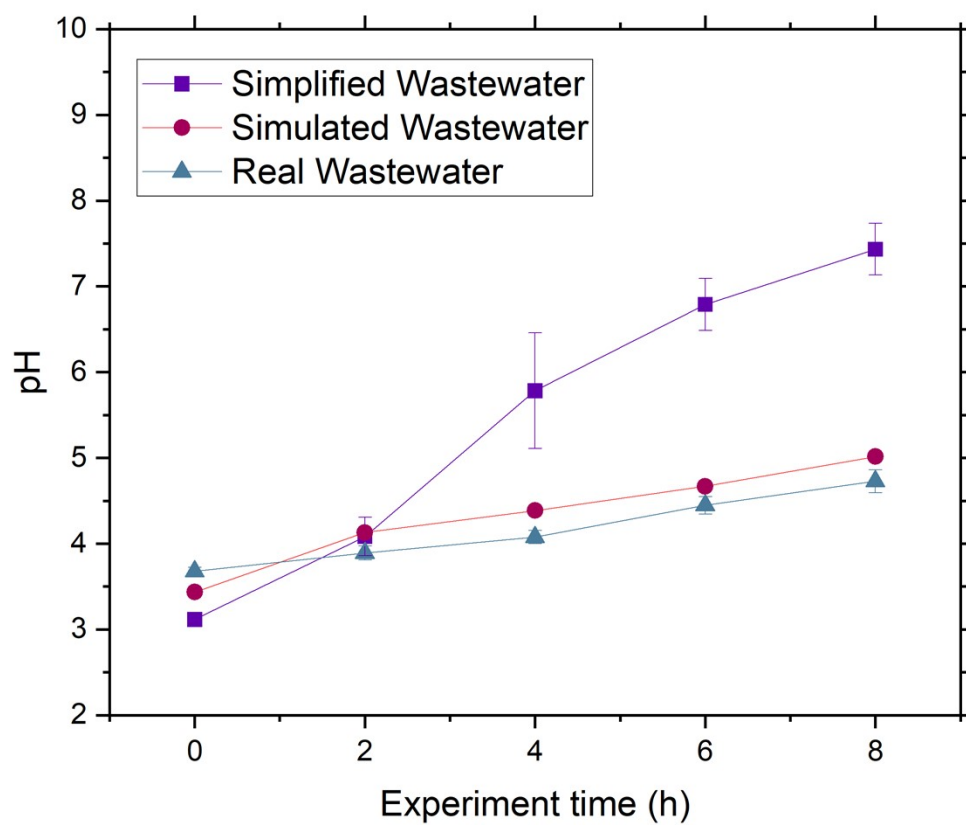

158

159 Fig. S9. pH trends of 2-chamber CPEs as a function of time. Error bars represent  $\pm$  one standard deviation

160 from triplicate experiments (n=3). Error bars not shown are smaller than the symbol.

161

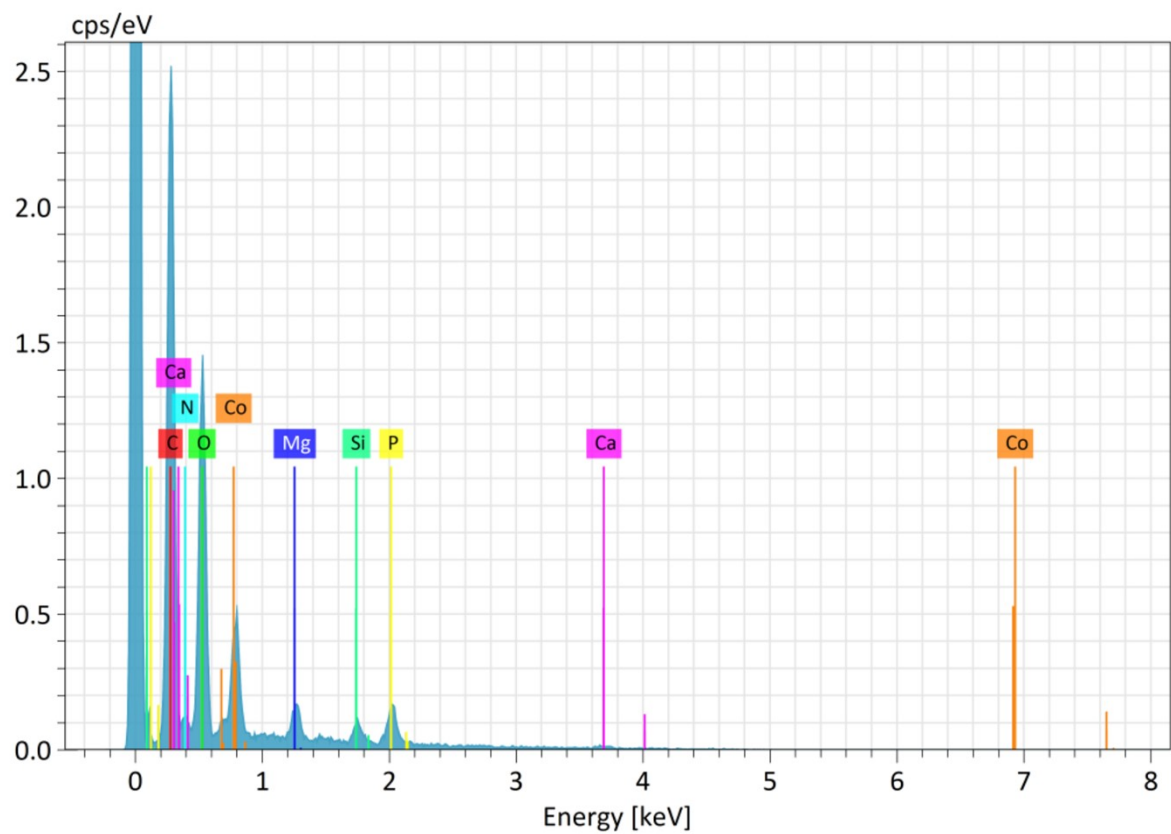

162

163 Fig. S10. EDS spectra of GC cathode post CPE in real wastewater.

164

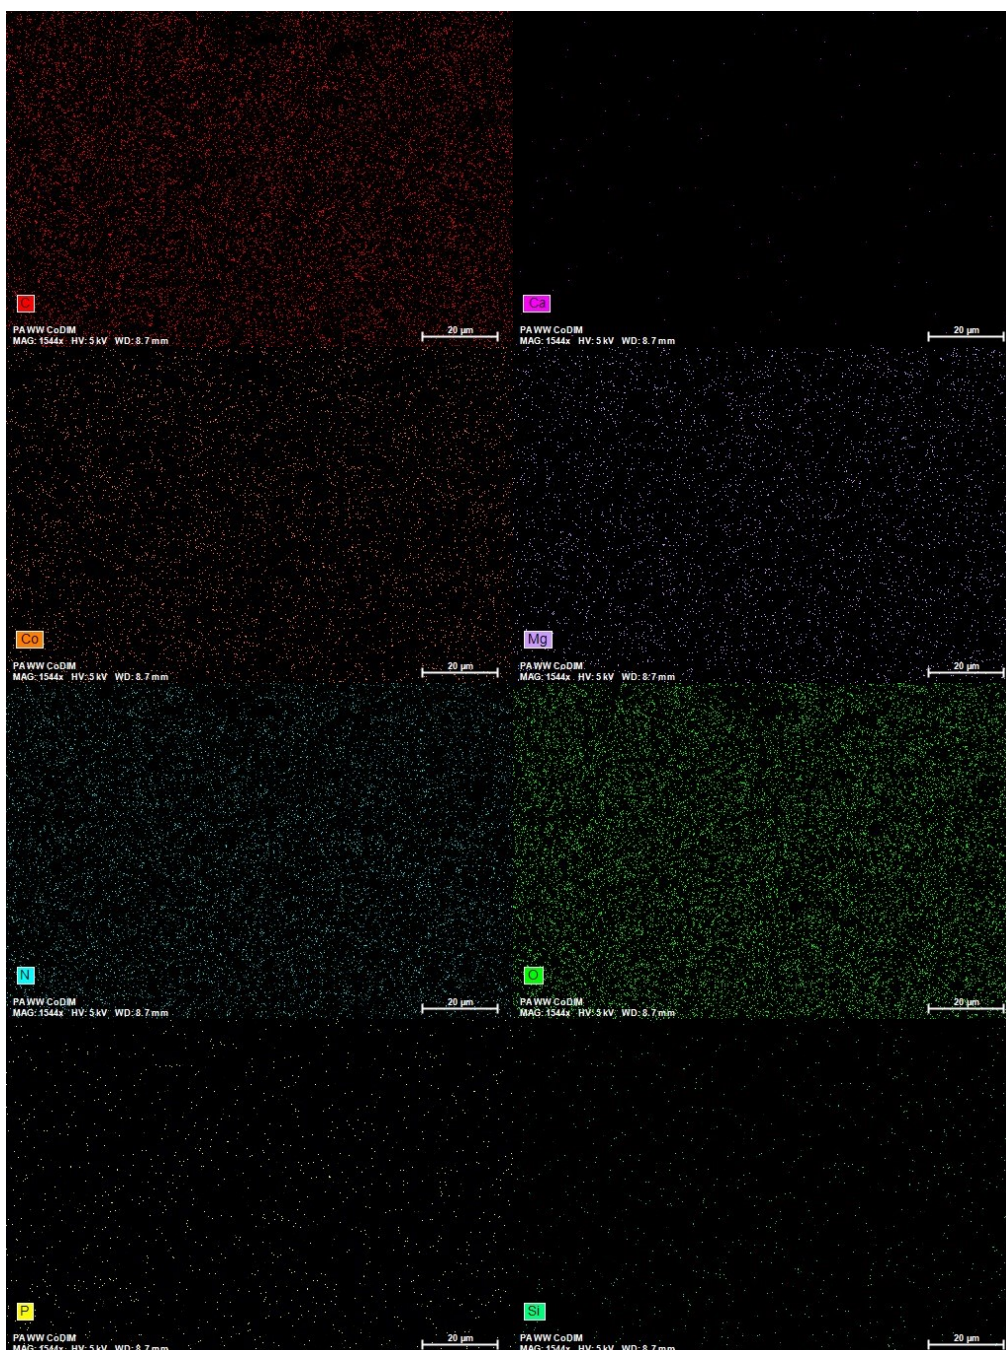

169 Fig. S11. EDS dark field maps of C, Ca, Co, Mg, N, O, P, and Si on GC electrodes post real wastewater  
170 CPE.

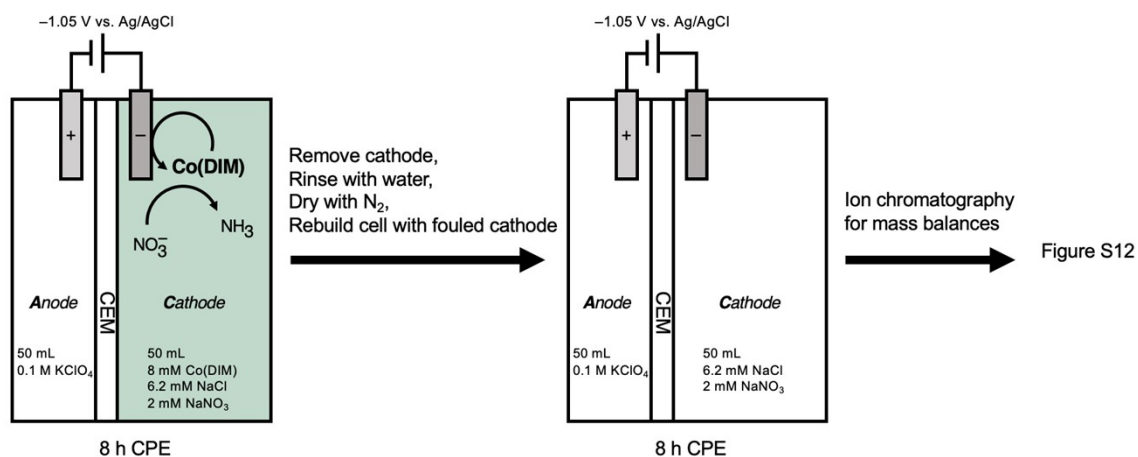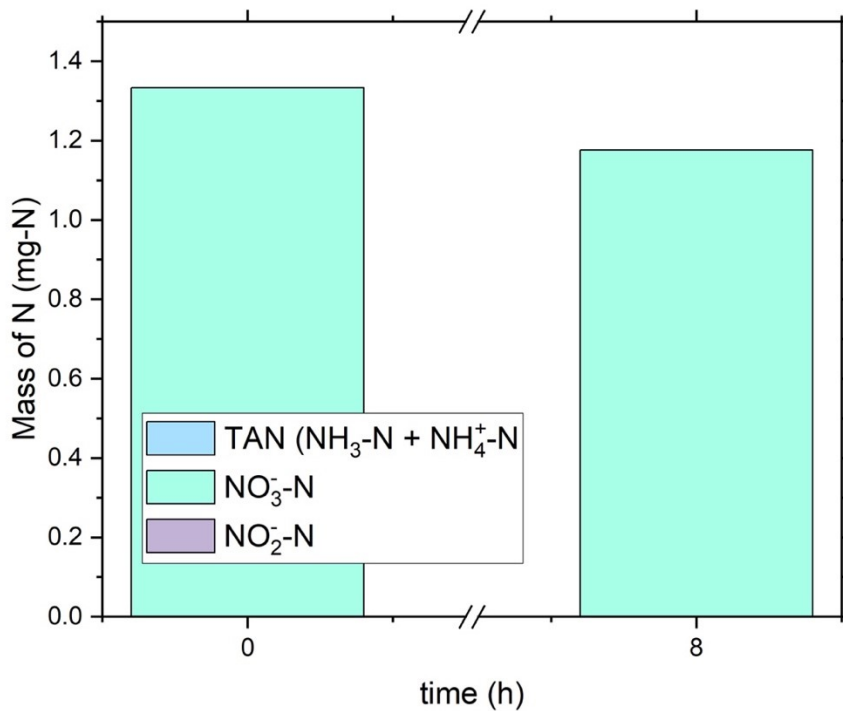

173

174 Fig. S12. Nitrogen mass balances for the rinse test (in simplified wastewater) of the deposit formed in {8  
 175 mM Co(DIM) + simplified wastewater}. No TAN or NO<sub>2</sub><sup>-</sup> was detected by ion chromatography. Detection  
 176 limit for NO<sub>3</sub><sup>-</sup>: 1.0 mg-NO<sub>3</sub><sup>-</sup>/L. Detection limit for NO<sub>2</sub><sup>-</sup>: 1.0 mg-NO<sub>2</sub><sup>-</sup>/L. Detection limit for TAN: 0.25 mg  
 177 NH<sub>4</sub><sup>+</sup>/L.



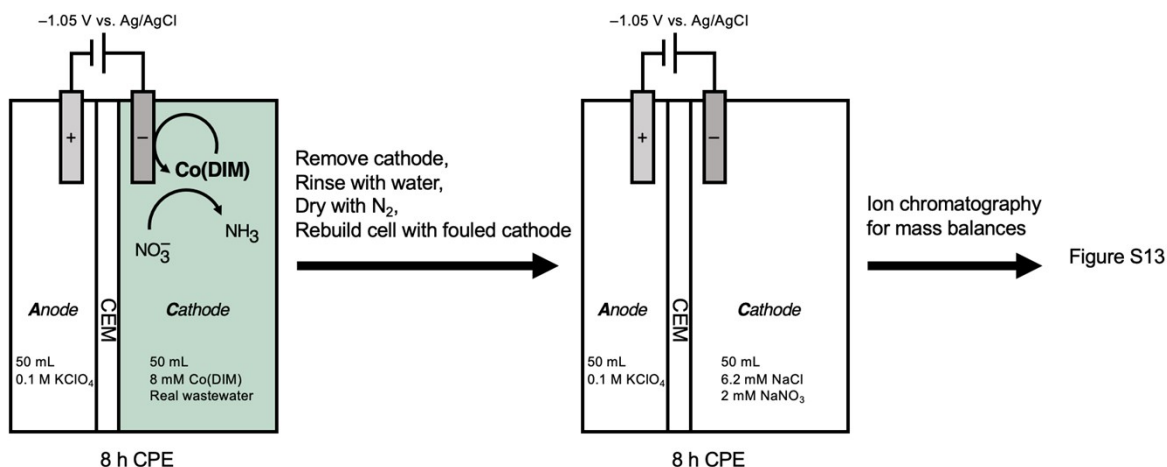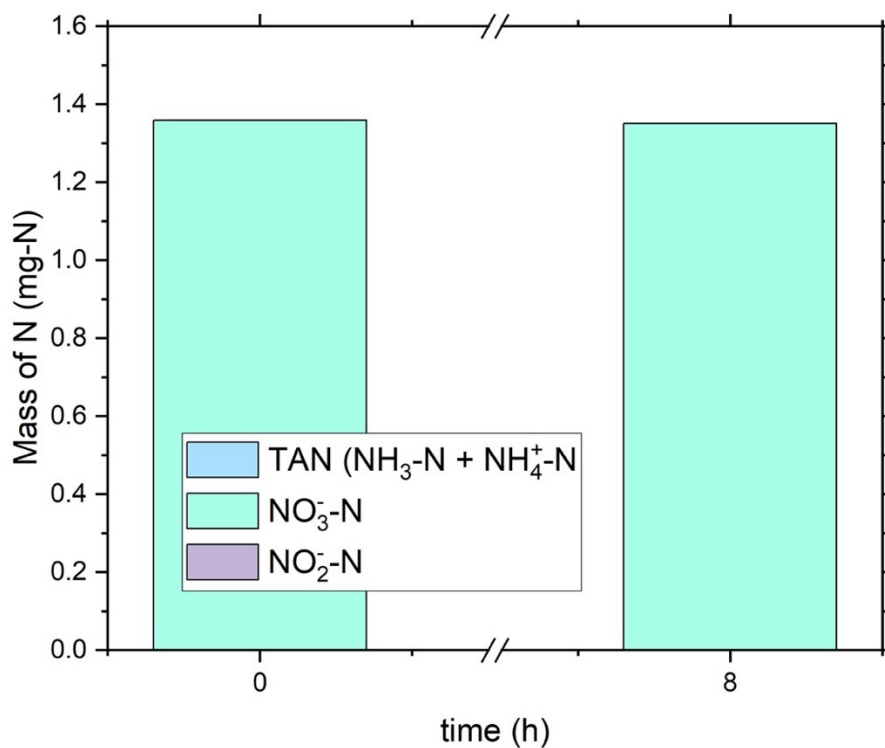

179

180

181 Fig. S13. N mass balances for the rinse test (in simplified wastewater) of the deposit formed in {8 mM  
 182 Co(DIM) + real wastewater}. No TAN or  $\text{NO}_2^-$  was detected by ion chromatography. Detection limit for  
 183  $\text{NO}_3^-$ : 1.0 mg- $\text{NO}_3^-$ /L. Detection limit for  $\text{NO}_2^-$ : 1.0 mg- $\text{NO}_2^-$ /L. Detection limit for TAN: 0.25 mg  $\text{NH}_4^+$ /L.





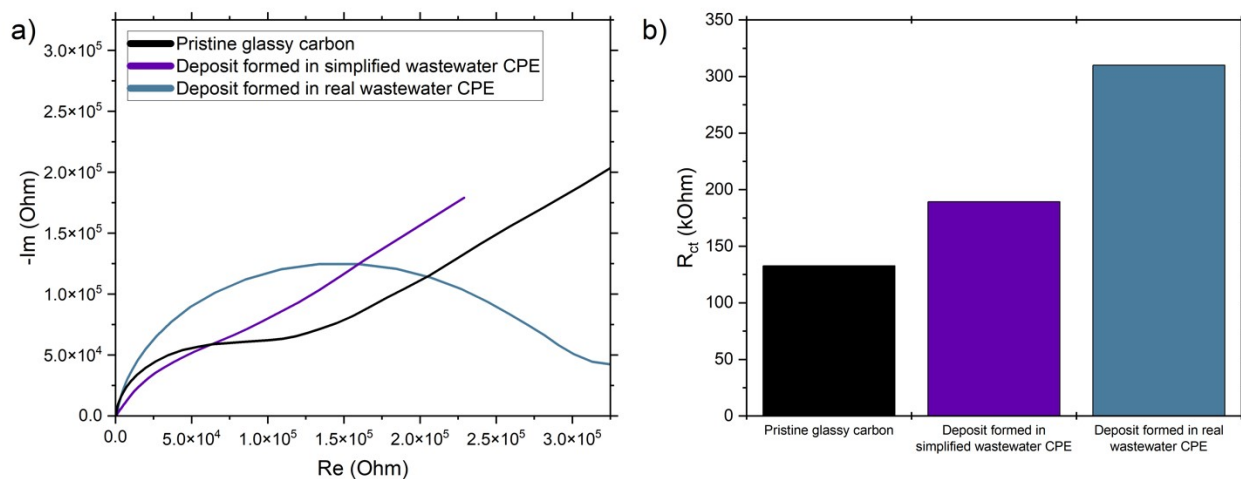

185

186 Fig. S14. a) Nyquist plots for potentiostatic electrochemical impedance spectroscopy (PEIS) of deposits  
 187 formed in CPE. The electrolyte was 8 mM Co(DIM) + 6.2 mM NaCl + 2 mM NaNO<sub>3</sub> and the measurement  
 188 was performed at open circuit with a sinusoidal potential amplitude of 10 mV and a frequency range of 1  
 189 MHz to 10 mHz. An electrochemical cone cell was used with a circular working electrode opening 5 mm  
 190 in diameter. The counter electrode was a 6.4 mm graphite rod and the reference electrode was a Ag/AgCl  
 191 (4.0 M KCl) electrode.  $R_{ct}$  was calculated by fitting a semi-circle to the region of the Nyquist plot before  
 192 the Warburg, then subtracting  $R_u$  (the low x-intercept of the Nyquist plot) from  $R_{ct} + R_u$  (the high x-  
 193 intercept).<sup>4,5</sup> b) Measured  $R_{ct}$  values from PEIS.

194

## 195 Section S4: Transport and contaminant conditions for catalysis inhibition

### 196 Section S4.1: Rotating disk electrode

197 To interrogate the sensitivity of inhibition to interfacial electrolyte composition, we used a rotating-  
198 disk electrode (RDE) to achieve well-defined transport conditions in the RDL. By varying the rotation rate,  
199 we modulated the delivery rate (and therefore steady-state concentrations) of  $\text{NO}_3^-$ , Co(DIM), and  
200 wastewater constituents during CPE. Under stagnant conditions (0 rotations per minute (RPM)), the current  
201 density of Co(DIM)-mediated  $\text{NO}_3\text{RR}$  in simplified wastewater (2 mM  $\text{NO}_3^-$ ) was greater than that of  
202 Co(DIM) in simplified wastewater (0 mM  $\text{NO}_3^-$ ), demonstrating steady-state catalytic current (Fig. 3a).  
203 Catalytic current in simplified wastewater was also observed with rotation rates of 9 and 25 RPM, indicating  
204 that homogeneous  $\text{NO}_3\text{RR}$  outpaces bulk catalyst delivery to the electrode surface with modest forced  
205 convection.<sup>6</sup> Conversely, catalytic current is lost in the range of 100 to 400 RPM, indicating that bulk  
206 catalyst delivery outpaces  $\text{NO}_3\text{RR}$  (Fig. S15). The rotation rates tested therefore span transport conditions  
207 for Co(DIM)-mediated  $\text{NO}_3\text{RR}$  catalysis and for Co(DIM) activation with no catalysis. In real wastewater  
208 (2 mM  $\text{NO}_3^-$ ), the current density vs. time effectively overlays with the simplified wastewater (2 mM  $\text{NO}_3^-$ )  
209 for the duration of the 5 min CPE, indicating no inhibition under stagnant conditions. Disturbing the RDL  
210 by forced convection causes a decay in current density in real wastewater, indicating inhibition. The coupled  
211 transport conditions and bulk solution composition for a fixed electrode potential therefore describe  
212 inhibition conditions.

213

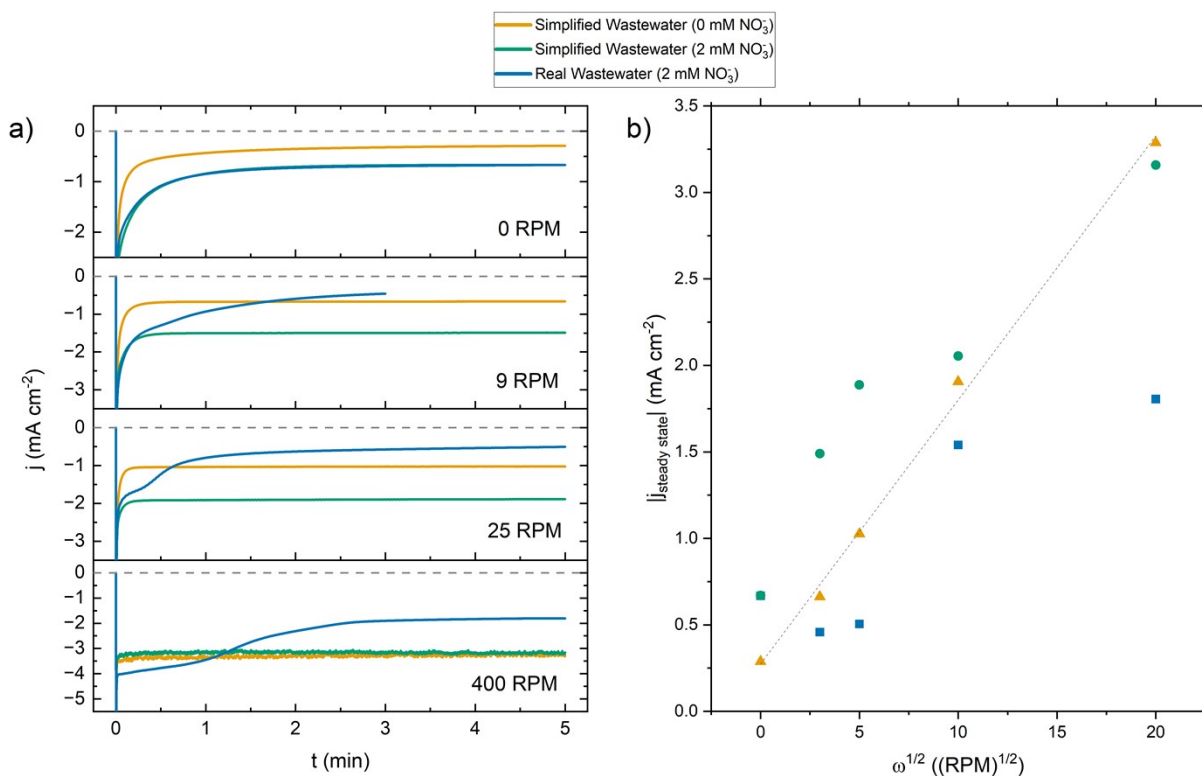

214

215 Fig. S15. (a) Current density vs. time for controlled-potential electrolysis (CPE) at  $-1.05$  V vs. Ag/AgCl  
 216 performed in a rotating-disk electrode (RDE) setup with 8 mM Co(DIM) as a function of rotations per  
 217 minute (RPM) in three electrolyte: simplified wastewater (0 mM NO<sub>3</sub><sup>-</sup>), simplified wastewater (2 mM NO<sub>3</sub><sup>-</sup>),  
 218 and real wastewater(2 mM NO<sub>3</sub><sup>-</sup>). The controlled rotation rate varied the delivery of NO<sub>3</sub><sup>-</sup>, Co(DIM), and  
 219 wastewater constituents to the RDL while the current density was monitored as a proxy for the NO<sub>3</sub>RR  
 220 activity. Rotation rates were kept below 400 RPM because faster rotation rates resulted in loss of catalytic  
 221 current (i.e., the same current density was observed for simplified wastewater (0 mM NO<sub>3</sub><sup>-</sup>) and simplified  
 222 wastewater (2 mM NO<sub>3</sub><sup>-</sup>)). b) Steady-state currents of RDE CPEs from Fig. 3a plotted versus the square root  
 223 of rotation rate (a proxy for diffusion layer thickness<sup>5</sup>). In the presence of nitrate and under sufficiently fast  
 224 rotation rates, bulk catalyst delivery outpaces NO<sub>3</sub>RR, causing the green and blue points to be nonlinear.

225

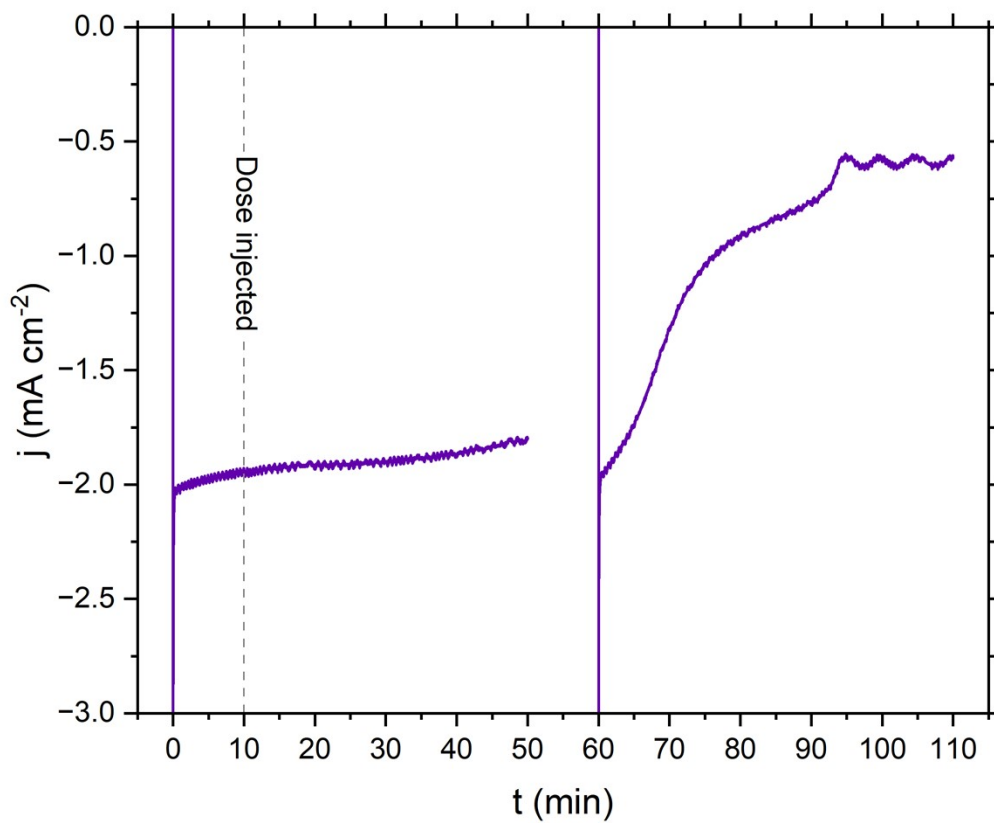

226

227 Fig. S16. Chronoamperogram for longer Mg dose RDE CPE experiment.  $-1.05 \text{ V}_{\text{Ag}/\text{AgCl}}$  was applied from  
 228  $t = 0$  to 50 minutes.  $28 \text{ } \mu\text{L}$  of  $1 \text{ M MgCl}_2$  was injected into the electrolyte at  $t = 10 \text{ min}$ . Then a period of  
 229 open circuit potential (OCP) was held from  $t = 50 \text{ min}$  to  $60 \text{ min}$ . Finally,  $-1.05 \text{ V}_{\text{Ag}/\text{AgCl}}$  was applied from  
 230  $t = 60$  to  $110$  minutes.

231 Section S4.2: Two-chamber CPE contaminant dosing experiments

232 In contaminant dosing experiments, the same two-chamber CPE setup was used as described in  
 233 Materials & Methods 2.2.2. After the 2 h sample aliquots were drawn from cathode and anode chambers, a  
 234 small volume of 1 M salts were manually injected (70  $\mu\text{L}$  1 M  $\text{MgCl}_2$ , 75  $\mu\text{L}$  1 M  $\text{NaHCO}_3$ , 95  $\mu\text{L}$  1 M  
 235  $\text{CaCl}_2$ ) into the catholyte recirculation bottle. The volume was chosen such that the catholyte concentration  
 236 of the target contaminant matched the target contaminant concentration in real wastewater.

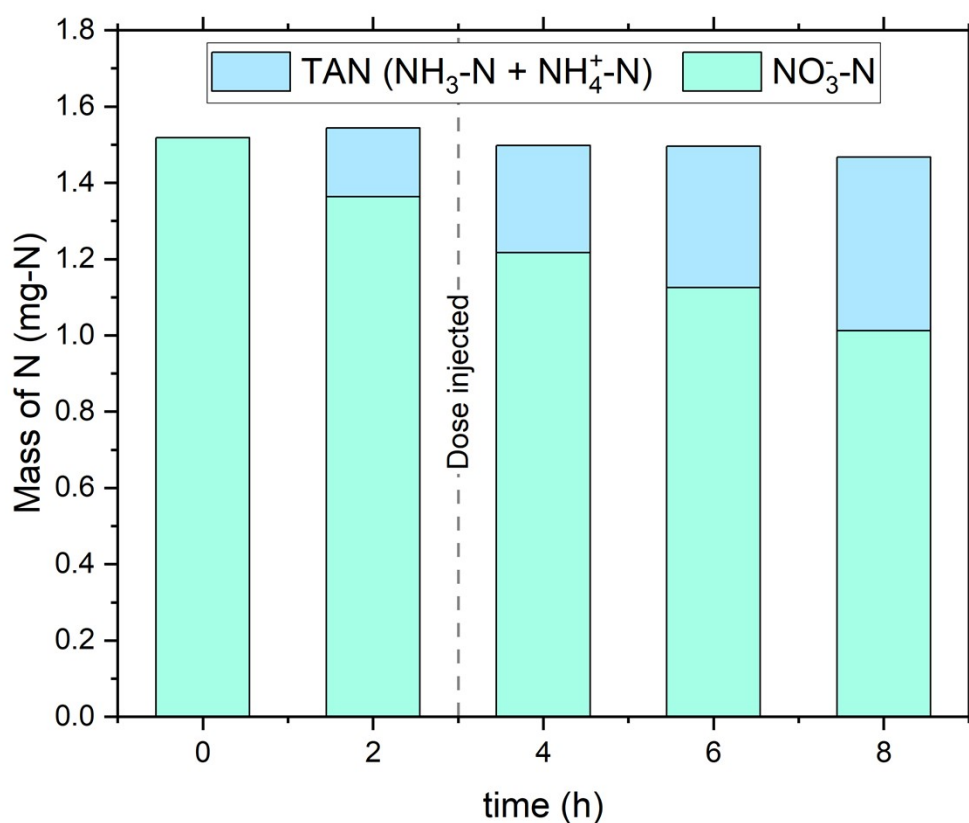

237

238 Fig. S17. N mass balance for  $\text{Ca}^{2+}$  dose two-chamber CPE experiment. 95  $\mu\text{L}$  1 M  $\text{CaCl}_2$  injected into the  
 239 catholyte at  $t = 2$  h.

240

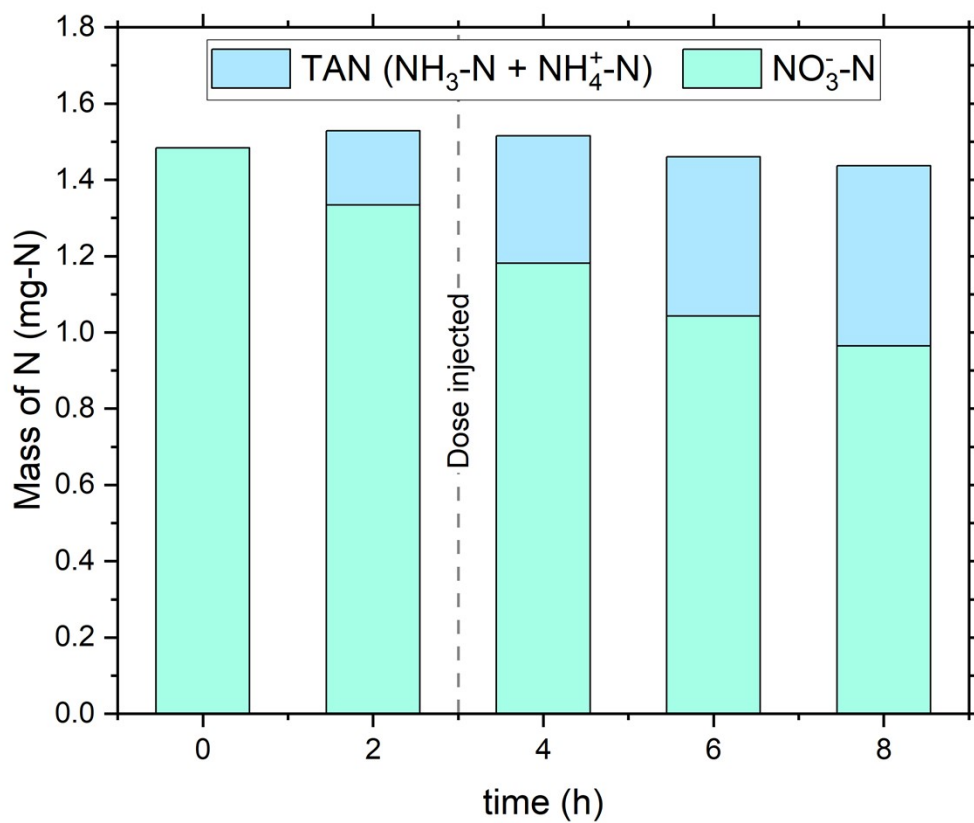

241

242 Fig. S18. N mass balance for  $\text{Mg}^{2+}$  dose two-chamber CPE experiment. 70  $\mu\text{L}$  1 M  $\text{MgCl}_2$  injected into the  
 243 catholyte at  $t = 2$  h.

244

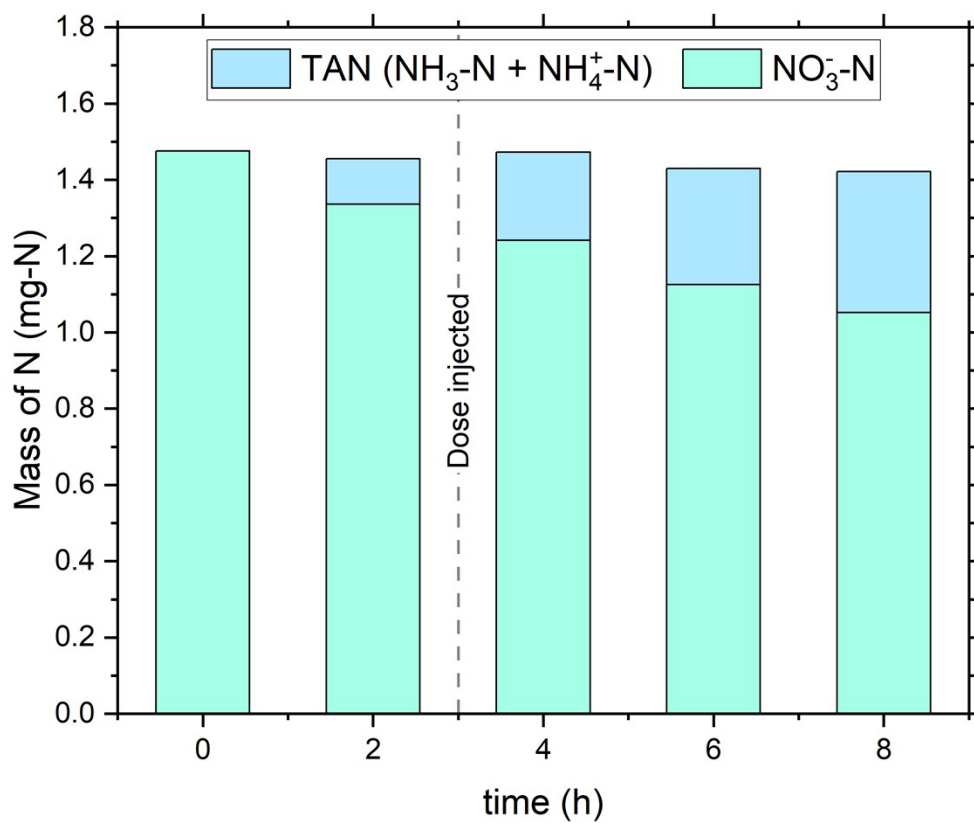

245

246 Fig. S19. N mass balance for  $\text{HCO}_3^-$  dose two-chamber CPE experiment. 75  $\mu\text{L}$  1 M  $\text{NaHCO}_3$  injected into  
 247 the catholyte at  $t = 2$  h.

248

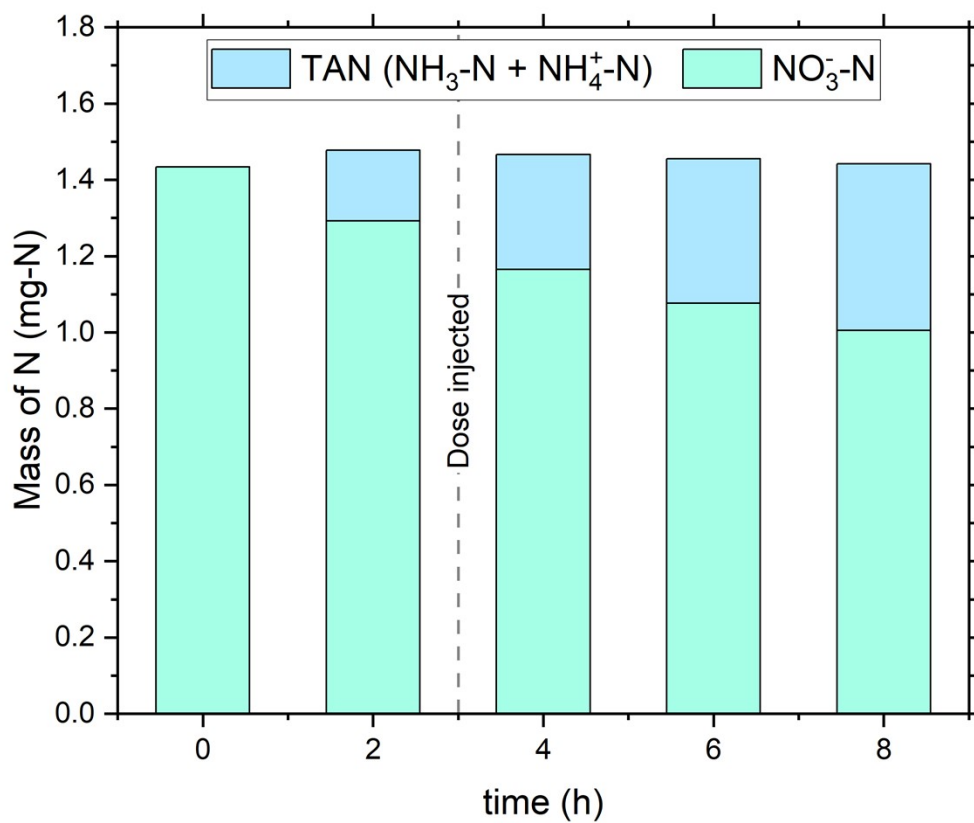

249

250 Fig. S20. N mass balance for simultaneous  $\text{Mg}^{2+}$  and  $\text{HCO}_3^-$  dose CPE experiment. 75  $\mu\text{L}$  1 M  $\text{NaHCO}_3$   
 251 and 70  $\mu\text{L}$  1 M  $\text{MgCl}_2$  injected into the catholyte at  $t = 2$  h.



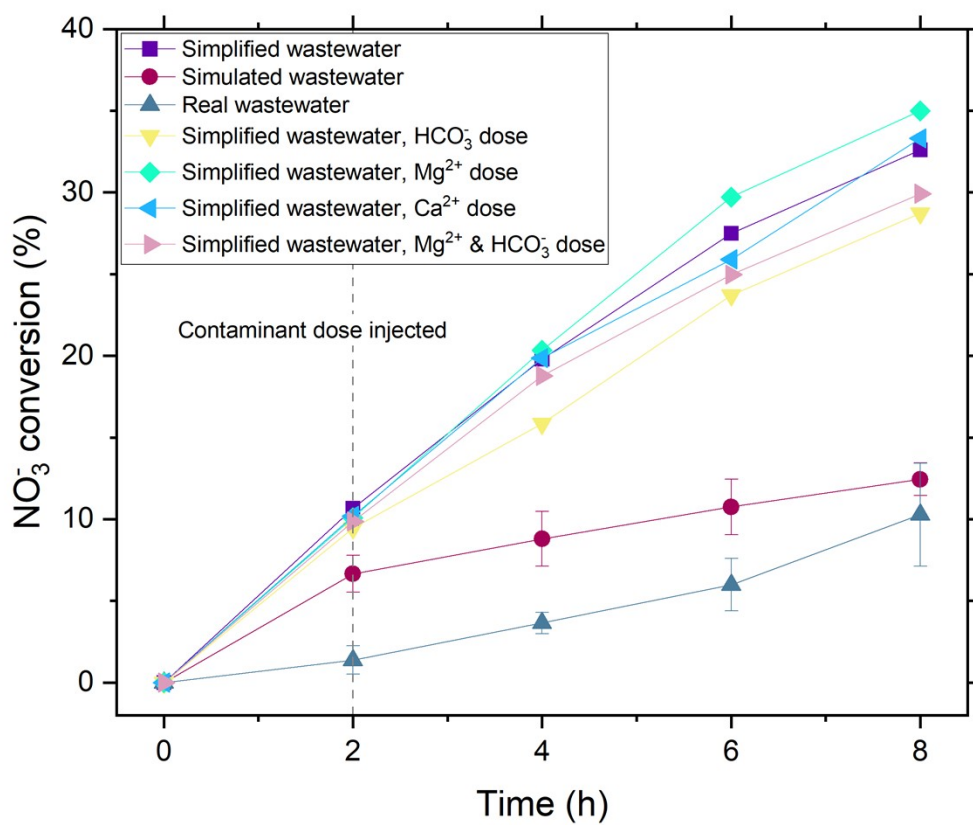

253

254 Fig. S21. Nitrate conversion for contaminant dose two-chamber CPE experiments.

255

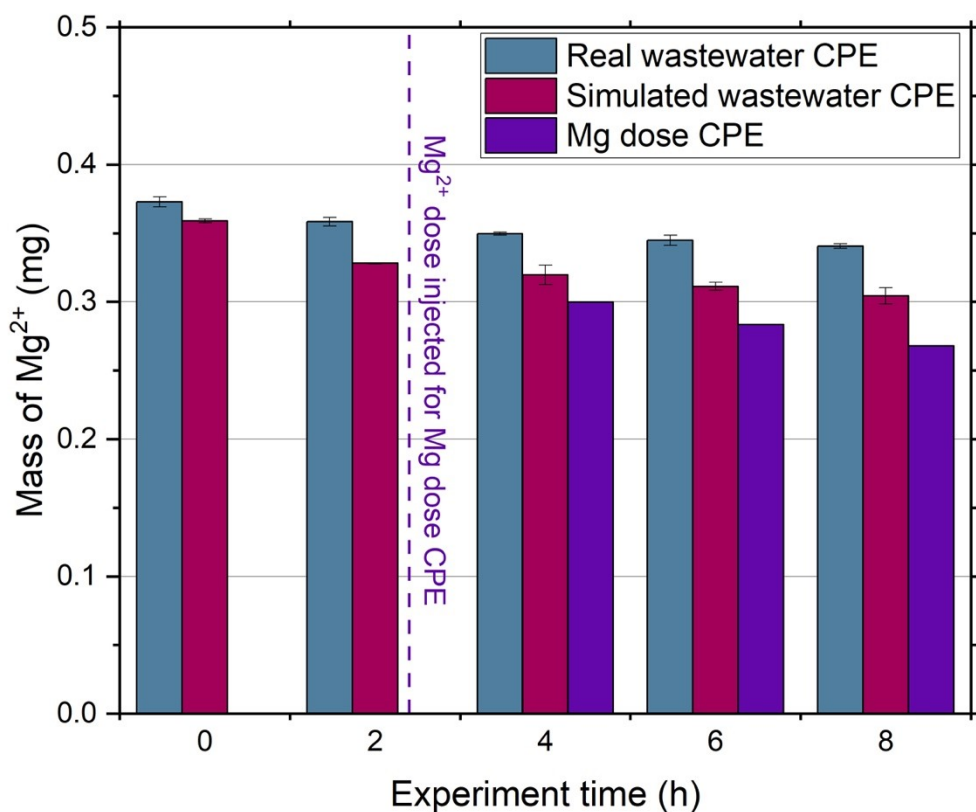

256

257 Fig. S22. Mg mass as a function of time for real wastewater CPE, simulated wastewater CPE, and Mg dose  
 258 CPE. Error bars represent  $\pm$  one standard deviation from triplicate experiments ( $n=3$ ). Note that Mg dose  
 259 CPE data are from one experiment. Consumption of Mg in real wastewater CPE:  $8.6 \pm 1.3\%$ . Consumption  
 260 of Mg in Simulated wastewater CPE:  $15.3 \pm 1.3\%$ . Consumption of Mg in Mg dose CPE:  $10.6\%$ .

261

## 262 Section S5: Electrocatalyst-in-a-box (ECaB)

### 263 Section S5.1: Equations used to evaluate ECaB

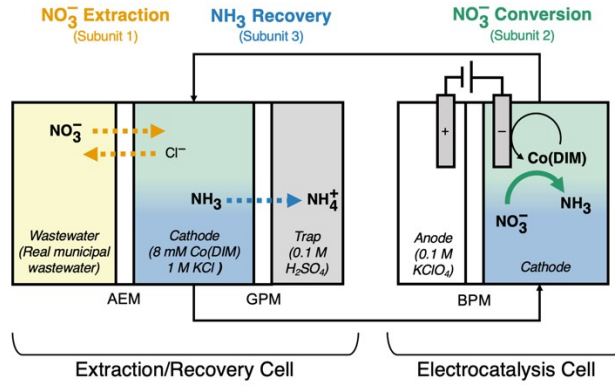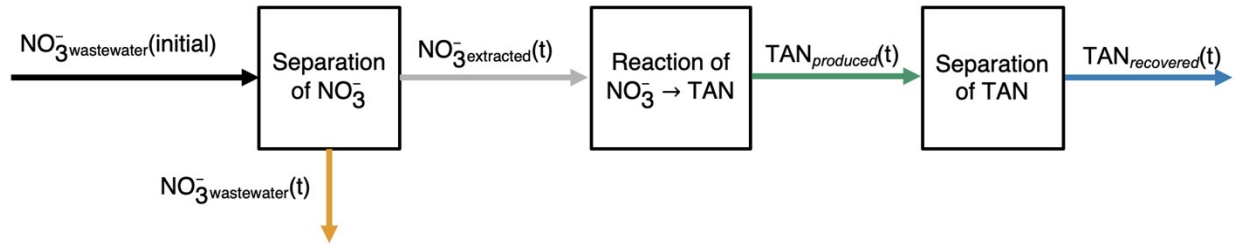

265

### 266 Efficiencies

$$267 \quad \eta_{NO_3^-, extraction} = \left( \frac{mol NO_3^- wastewater(initial) - mol NO_3^- wastewater(t)}{mol NO_3^- wastewater(initial)} \right) = \left( \frac{mol NO_3^- extracted(t)}{mol NO_3^- wastewater(initial)} \right) \quad (\text{Equation S5.1.1})$$

$$268 \quad X_{NO_3^-}(t) = \frac{mol NO_3^- extracted(0 \text{ h CPE}) - mol NO_3^- extracted(t)}{mol NO_3^- extracted(t)} = \frac{mol NO_3^- converted(t)}{mol NO_3^- extracted(t)} \quad (\text{Equation S5.1.2})$$

$$269 \quad Y_{TAN} = X_{NO_3^-} * S_{TAN} = \frac{mol TAN_{produced}(t)}{mol NO_3^- extracted(t)},$$

$$270 \quad \text{where for ECaB, } mol TAN_{produced}(t) = mol TAN_{catholyte}(t) + mol TAN_{trap}(t) \quad (\text{Equation S5.1.3})$$

$$271 \quad \eta_{TAN, recovery} = \left( \frac{mol TAN_{trap}(t)}{mol TAN_{produced}(t)} \right) = \left( \frac{mol TAN_{recovered}(t)}{mol TAN_{produced}(t)} \right) \quad (\text{Equation S5.1.4})$$

$$272 \quad \eta_{N recovery, overall} = \left( \frac{mol TAN_{recovered}(t)}{mol NO_3^- wastewater(initial)} \right) \quad (\text{Equation S5.1.5})^*$$

$$273 \quad \eta_{N recovery, overall} = \eta_{NO_3^-, extraction} * Y_{TAN} * \eta_{TAN, recovery} = \left( \frac{mol TAN_{trap}(t)}{mol NO_3^- wastewater(initial)} \right) \quad (\text{Equation S5.1.6})^*$$

274

275  $\eta_{N\ recovery, overall}$  for ECaB was calculated by Equations S5 and S6 and both datasets are shown in Fig. SX. Data  
 276 calculated by Equations S5 and S6 are in agreement within experimental error for all time points.

$$277 \quad FE\ to\ TAN\ (\%) = \left( \frac{n * F * mol\ TAN_{produced}}{Q_{passed}} \right) * 100\% \quad (\text{Equation S5.1.7})$$

278 where  $n = \text{number of electrons (8) required to produce one mole of TAN from } NO_3^-$ ,

279  $Q_{passed} = \text{charge passed in CPE in units of } C, \text{ and } F = 96485\ C\ mol^{-1}$

280

## 281 Rates

$$282 \quad Areal\ NO_3^- \text{ extraction rate} = \frac{mol\ NO_3^- \text{ extracted}(t)}{t * A_{cross\ sectional}} \quad (\text{Equation S5.1.8})$$

$$283 \quad Volumetric\ NO_3^- \text{ extraction rate} = \frac{mol\ NO_3^- \text{ extracted}(t)}{t * V_{wastewater}} \quad (\text{Equation S5.1.9})$$

$$284 \quad Areal\ NO_3^- \text{ conversion rate} = \frac{mol\ NO_3^- \text{ converted}(t_{CPE})}{t_{CPE} * A_{cross\ sectional}} \quad (\text{Equation S5.1.10})$$

$$285 \quad Volumetric\ NO_3^- \text{ conversion rate} = \frac{mol\ NO_3^- \text{ converted}(t_{CPE})}{t_{CPE} * V_{catholyte}} \quad (\text{Equation S5.1.11})$$

$$286 \quad Areal\ TAN\ production\ (yield)\ rate = \frac{mol\ TAN_{produced}(t_{CPE})}{t_{CPE} * A_{cross\ sectional}} \quad (\text{Equation S5.1.12})$$

$$287 \quad Volumetric\ TAN\ production\ (yield)\ rate = \frac{mol\ TAN_{produced}(t_{CPE})}{t_{CPE} * V_{catholyte}} \quad (\text{Equation S5.1.13})$$

$$288 \quad Areal\ TAN\ recovery\ rate = \frac{mol\ TAN_{recovered}(t)}{t * A_{cross\ sectional}} \quad (\text{Equation S5.1.14})$$

$$289 \quad Volumetric\ TAN\ recovery\ rate = \frac{mol\ TAN_{recovered}(t)}{t * V_{catholyte}} \quad (\text{Equation S5.1.15})$$

$$290 \quad Pseudo\ instant.\ [NO_3^-] \text{ normalized conversion rate} = \frac{mol\ NO_3^- \text{ converted}(t) - mol\ NO_3^- \text{ converted}(t-1)}{C_{NO_3^- \text{ catholyte}} (t-1) * V_{catholyte}} \quad (\text{Equation S5.1.16})$$

291

292 **Energy consumption**

293 
$$\text{Energy consumed for } NO_3^- \text{ extraction} = \frac{E_{cell,av} * Q_{passed}}{mol NO_3^- \text{ extracted}(t)} \quad (\text{Equation S5.1.17})$$

294 
$$\text{Energy consumed for } NO_3^- \text{ conversion} = \frac{E_{cell,av} * Q_{passed}}{mol NO_3^- \text{ converted}(t)} \quad (\text{Equation S5.1.18})$$

295 
$$\text{Energy consumed for TAN production} = \frac{E_{cell,av} * Q_{passed}}{mol TAN_{produced}(t)} \quad (\text{Equation S5.1.19})$$

296 
$$\text{Energy consumed for TAN recovery} = \frac{E_{cell,av} * Q_{passed}}{mol TAN_{recovered}(t)} \quad (\text{Equation S5.1.20})$$

297

298 **Electricity operational expenditure**

299 
$$\text{Recovered } (NH_4)_2SO_4 \text{ cost} = \frac{E_{cell,av} * Q_{passed}}{mol TAN_{recovered}(t)} \times \frac{\text{¢3}}{kWh} \quad (\text{Equation S5.1.21})$$

300 Equation 5.1.21 was used to calculate the cost of producing purified ammonium sulfate when considering

301 electricity as the only operational expenditure at a cost of ¢3 kWh<sup>-1</sup>.<sup>7</sup>

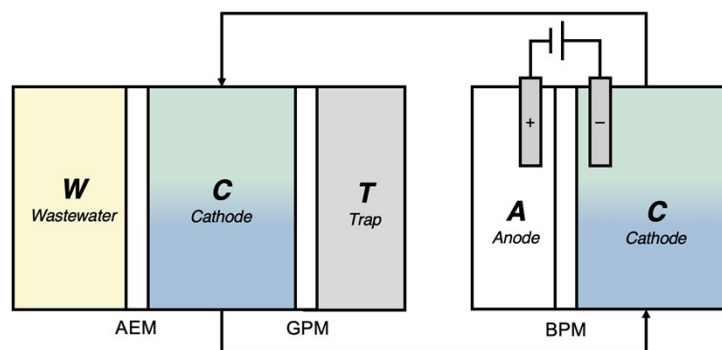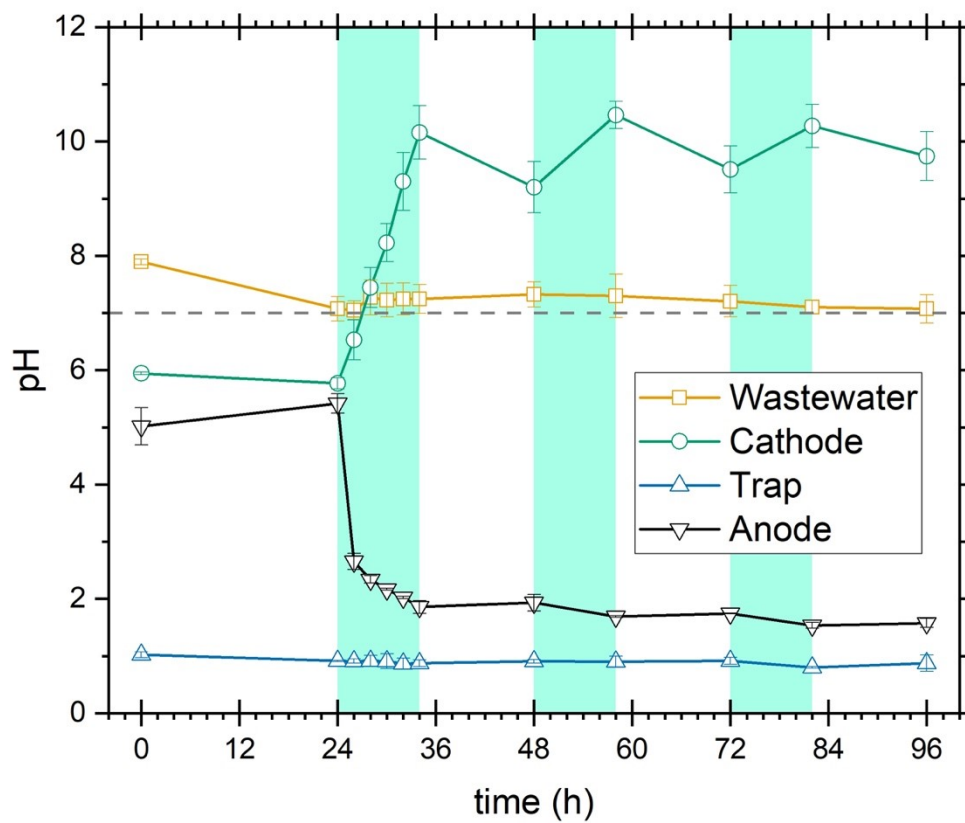

304

305 Fig. S23. pH trends of the 4 chambers in proof-of-concept ECaB. Error bars represent  $\pm$  one standard

306 deviation from triplicate experiments (n=3).

307

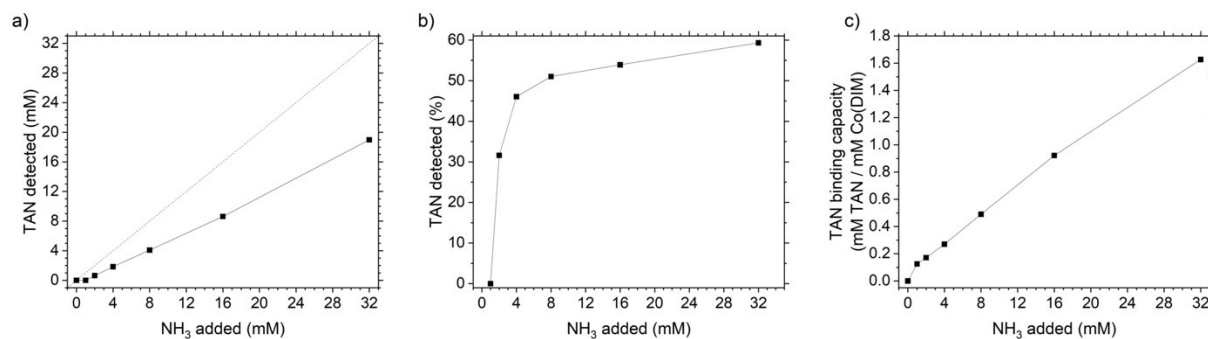

308

309 Fig. S24. Binding of TAN to Co(DIM). Experiments were carried out by adding 0, 1, 2, 4, 8, 16, or 32 mM  
 310 NH<sub>3</sub> (as NH<sub>4</sub>OH) to vials of 1 M KCl + 8 mM Co(DIM), pH 10.5. Vials were shaken vigorously for 4 h,  
 311 acidified with concentrated H<sub>2</sub>SO<sub>4</sub>, and then TAN was measured by cation IC. (a) TAN concentration  
 312 detected by cation IC as a function of NH<sub>3</sub> concentration added. Deviation from the dotted line ( $y = x$ )  
 313 indicates TAN adsorption by Co(DIM). (b) Percent of TAN detected as a function of NH<sub>3</sub> added. More of  
 314 the added nitrogen binds to Co(DIM) at low NH<sub>3</sub> concentrations. (c) Observed TAN binding capacity of  
 315 Co(DIM).

316

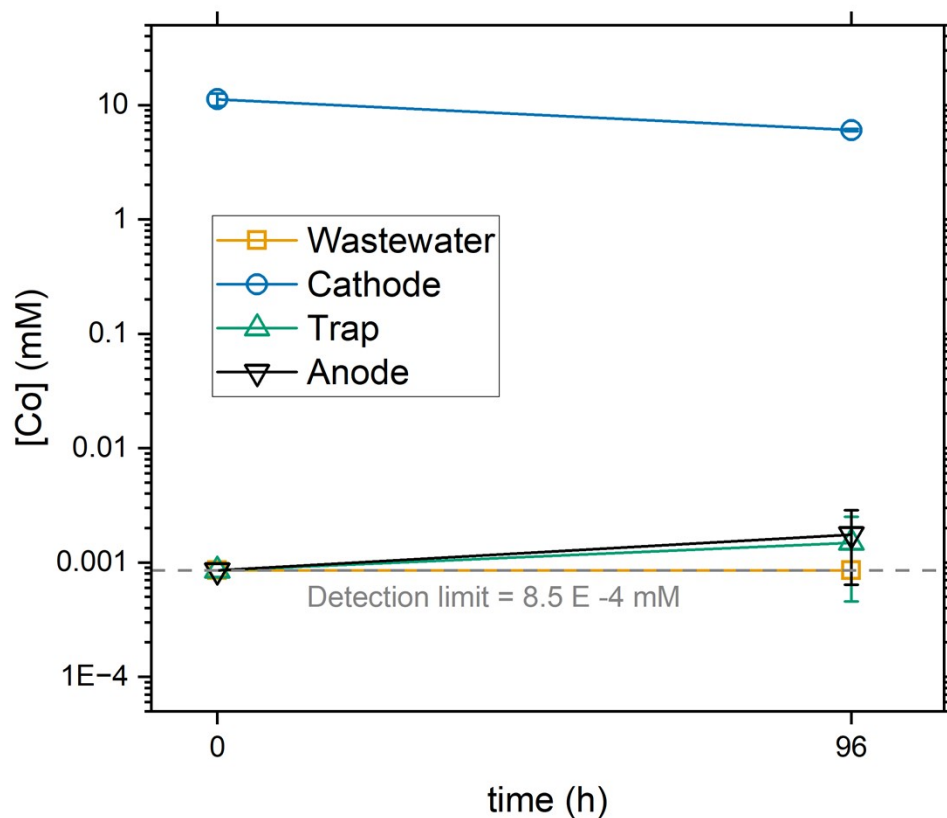

317

318 Fig. S25. Concentration of Co ( $^{59}\text{Co}$ ) in each chamber of proof-of-concept ECab at initial (0 h) and final  
 319 (96 h) time points. Co concentration was below detection ( $0.85 \mu\text{M}$ ) for the initial and final wastewater  
 320 time points, and for the initial trap and anode time points. These data demonstrate that Co(DIM) remained  
 321 in the cathode chamber of ECab proof-of-concept. Error bars represent  $\pm$  one standard deviation from  
 322 triplicate experiments ( $n=3$ ).

323



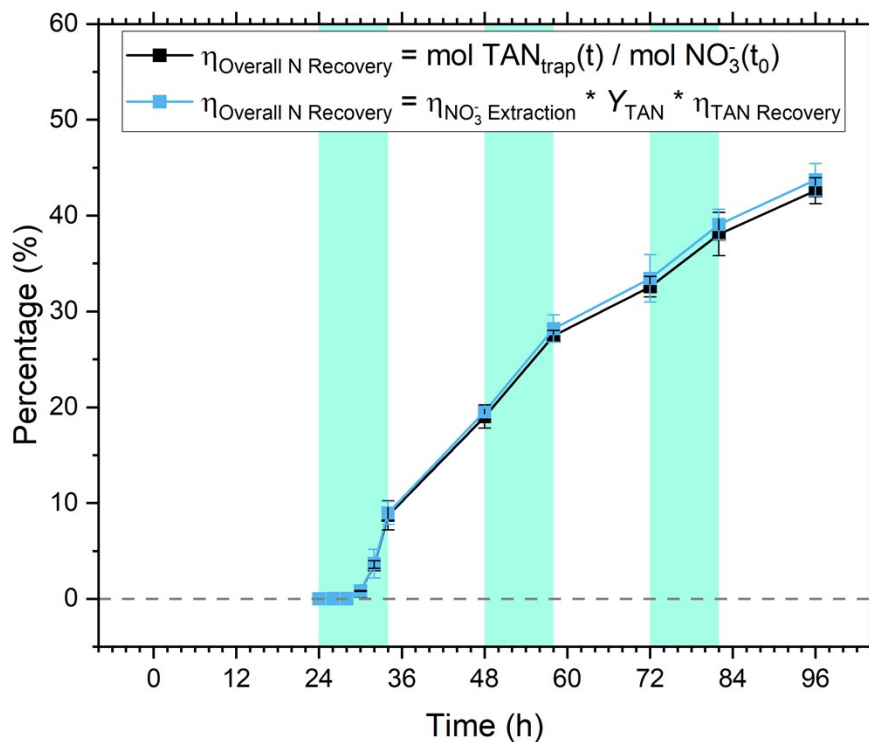

324

325 Fig. S26. Overall N recovery of proof-of-concept ECaB calculated two ways. Black trace was calculated  
 326 as the mass of TAN in the trap divided by the initial mass of nitrate-nitrogen in the wastewater (Equation  
 327 S5.1.5). Blue was calculated by multiplying the nitrate extraction efficiency, the yield of TAN, and the  
 328 TAN recovery efficiency (Equation S5.1.6). Error bars represent  $\pm$  one standard deviation from triplicate  
 329 experiments (n=3).

330

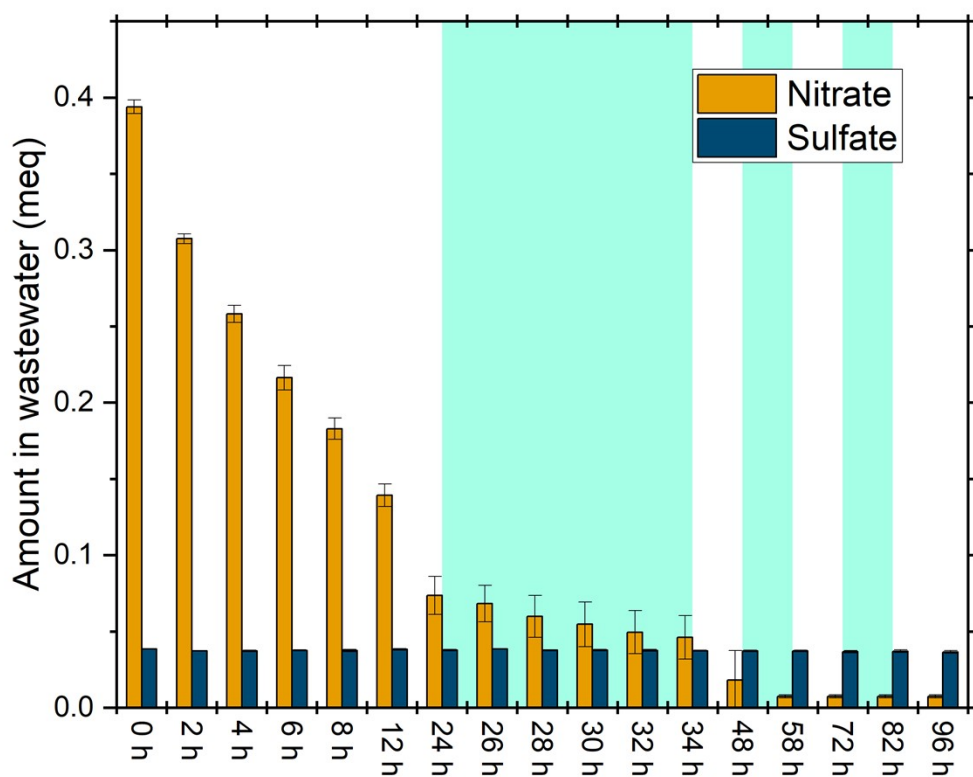

331

332 Fig. S27. Amount (in milliequivalents of charge) of nitrate and sulfate ions in wastewater chamber as a  
 333 function of time for proof-of-concept ECaB. Error bars represent  $\pm$  one standard deviation from triplicate  
 334 experiments (n=3).

335

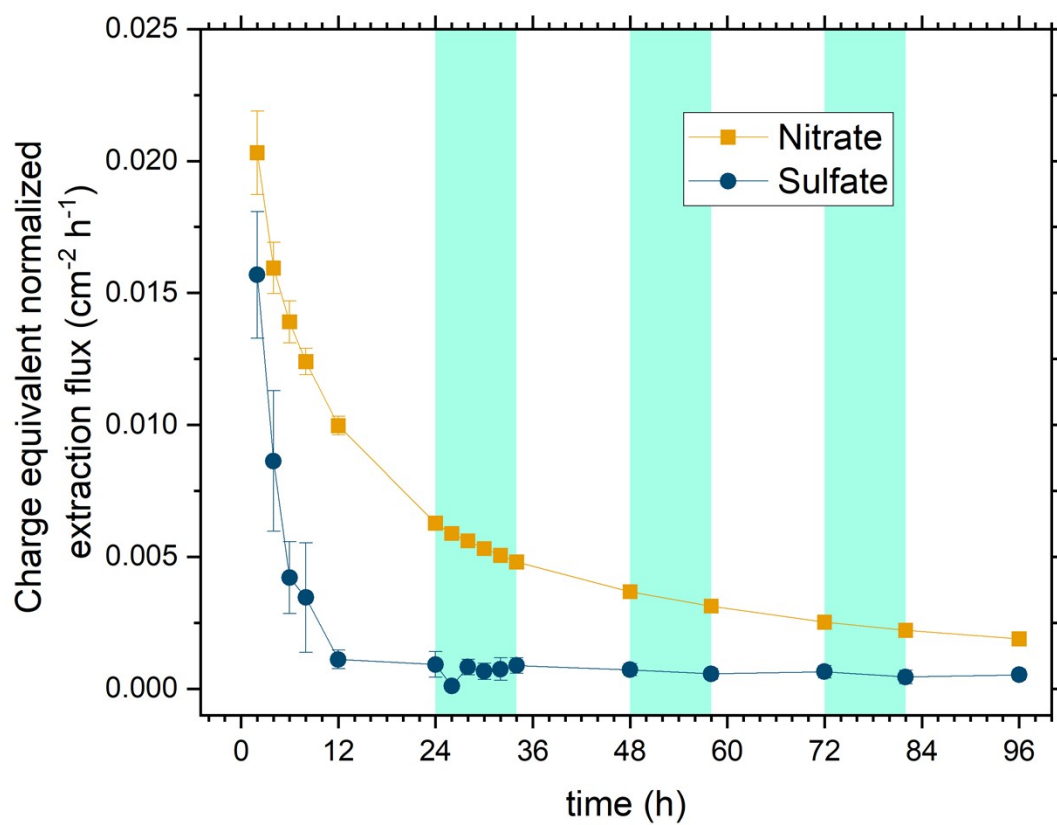

336

337 Fig. S28. Extraction flux (normalized to concentration in milliequivalents of charge) of nitrate and sulfate  
 338 ions as a function of time for proof-of-concept ECaB. Error bars represent  $\pm$  one standard deviation from  
 339 triplicate experiments (n=3).

340

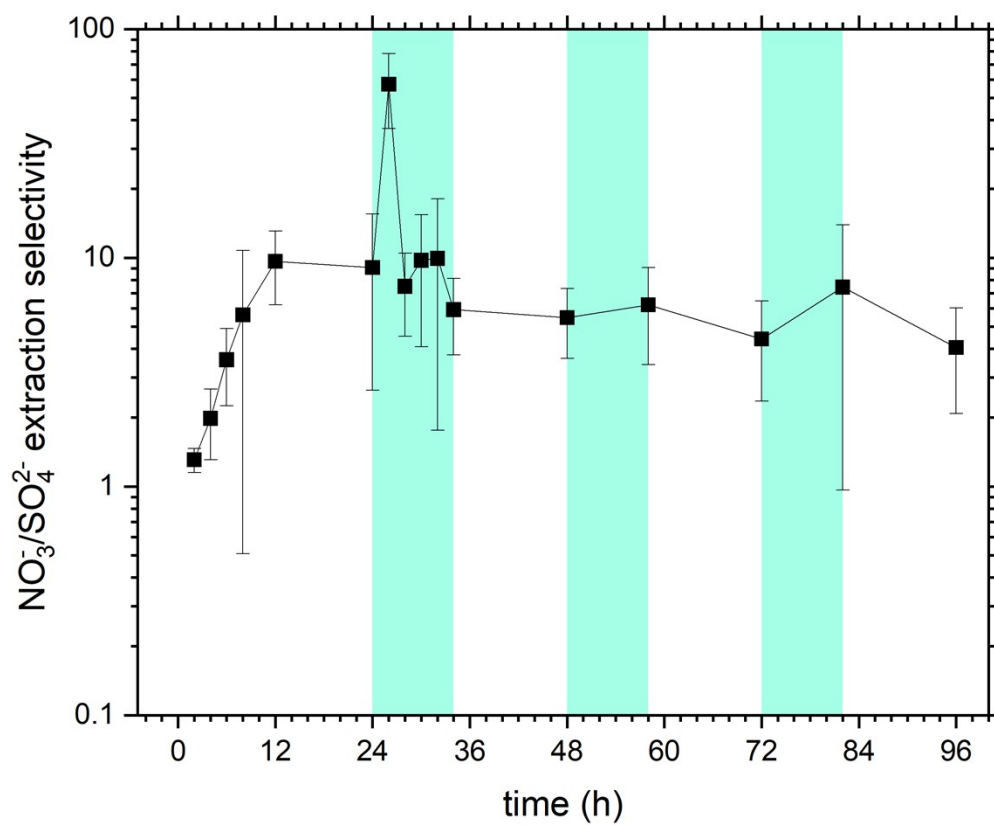

341

342 Fig. S29. Extraction selectivity (calculated as the fraction of nitrate flux divided by sulfate flux) of nitrate  
 343 ions over sulfate ions as a function of time for proof-of-concept ECaB. Error bars represent  $\pm$  one standard  
 344 deviation from triplicate experiments (n=3).

345

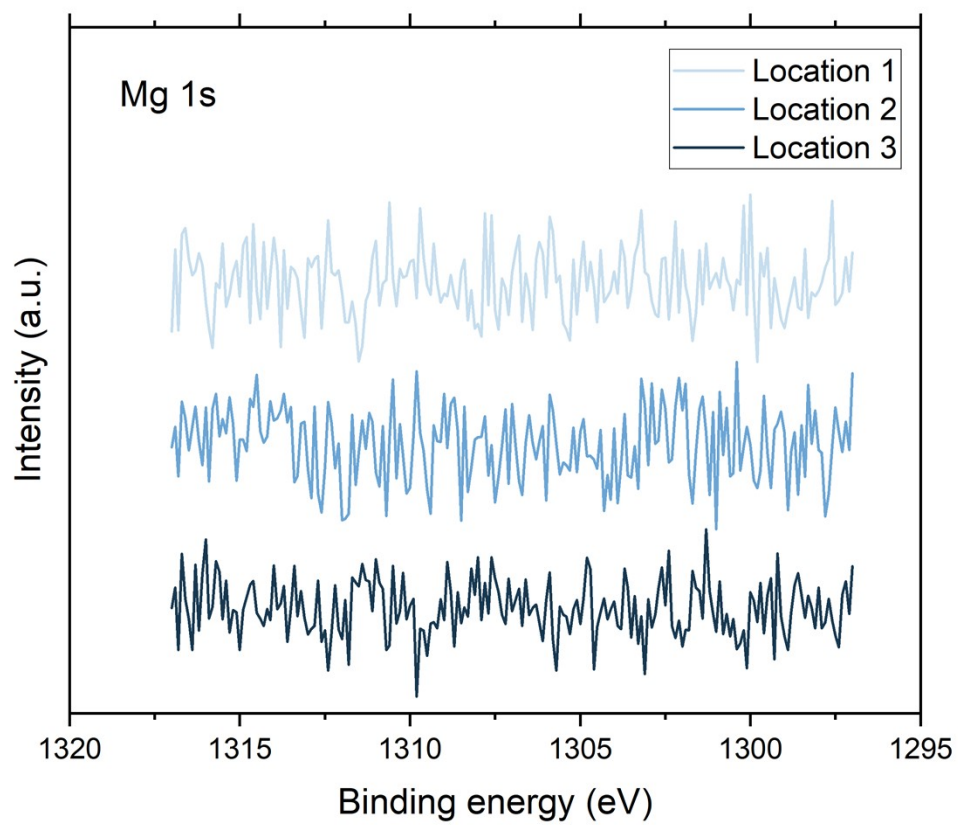

346

347 Fig. S30. XPS Mg 1s scans at three locations of one glassy carbon cathode after proof-of-concept ECaB

348 experiment.

349

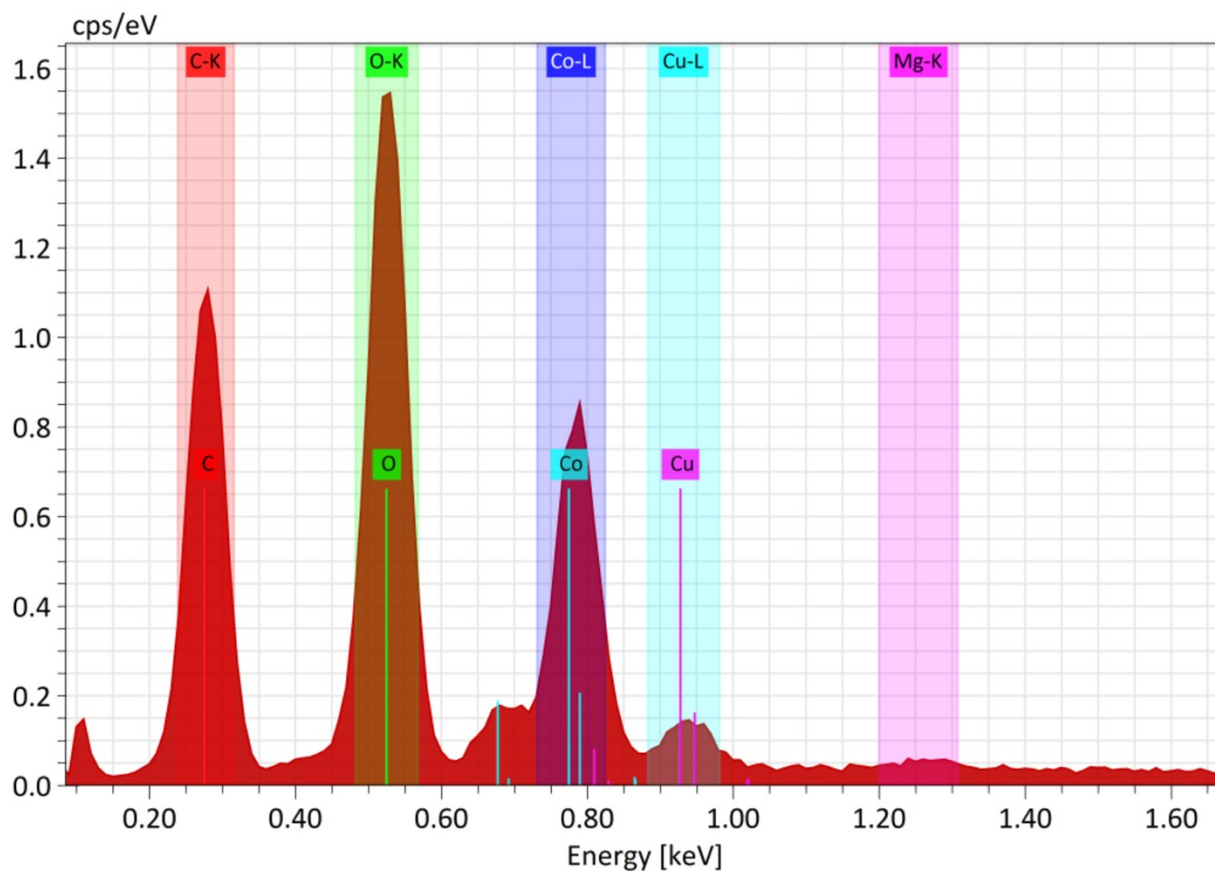

350

351 Fig. S31. EDS spectrum of glassy carbon cathode after proof-of-concept ECaB experiment. A small amount  
 352 of Cu was found on the surface, presumably the from Cu tape used as electrical leads to the GC plate  
 353 cathode and mixed-metal oxide anode.

354

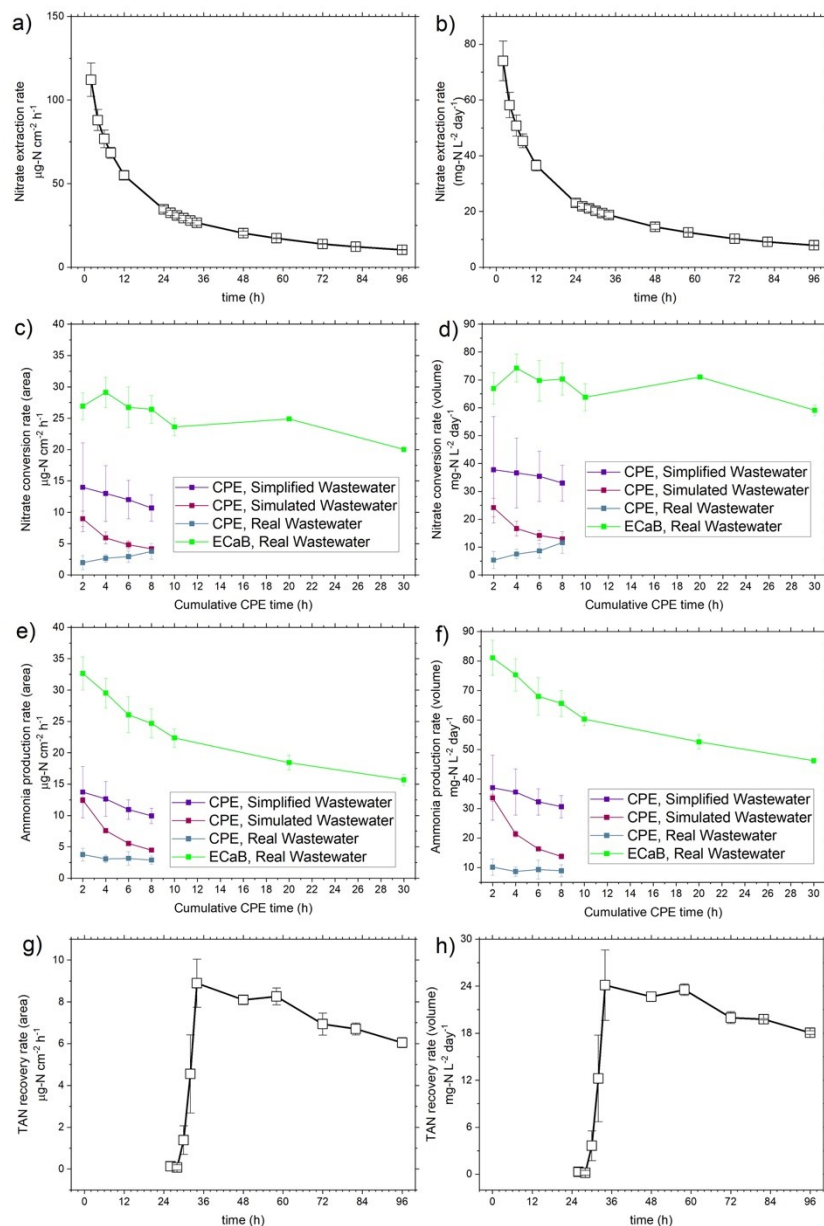

355

356 Fig. S32. a) Areal (normalized to AEM area) and b) volumetric (normalized to wastewater volume) nitrate  
 357 extraction rates. c) Areal (normalized to GC area) and d) volumetric (normalized to catholyte volume)  
 358 nitrate conversion rates. e) Areal (normalized to GC area) and f) volumetric (normalized to catholyte  
 359 volume) TAN yield rates. For nitrate conversion and TAN yield time is cumulative time of CPE. g) Areal  
 360 (normalized to GPM area) and h) volumetric (normalized to catholyte volume) TAN recovery rates. AEM,  
 361 GC, and GPM had the same geometric surface area ( $5.4 \text{ cm}^2$ ). Error bars represent  $\pm$  one standard deviation  
 362 from triplicate experiments ( $n=3$ ) of proof-of-concept ECaB.

## Section S6: Donnan dialysis equilibrium calculations

In Donnan dialysis, an ion exchange membrane separates a wastewater (or feed solution) and a saline electrolyte (or receiving solution). Ion exchange between the two solutions is driven by an electrochemical potential gradient for each ion  $i$  in the system. More concretely, Donnan dialysis was employed in this work using a concentrated  $\text{Cl}^-$  electrolyte as the receiving solution and  $\text{NO}_3^-$ -rich municipal secondary effluent as the feed solution. When separated by an AEM, feed  $\text{NO}_3^-$  ions spontaneously exchange with receiver  $\text{Cl}^-$  ions in the synthetic electrolyte, while cation migration is precluded by the fixed positive charges in the membrane.

### Section S6.1: System of equations (ion mass balances, electroneutrality, and Donnan equilibrium)

In this section, we provide a system of equations used to model equilibrium conditions for a Donnan dialysis (DD) process. We show general equations which can be applied to any number of ions  $i$  in a system where there is a feed solution (FS) and receiving solution (RS) separation by an ion exchange membrane. For the DD process in this work, we consider only  $\text{Cl}^-$  and  $\text{NO}_3^-$  because the monovalent-selective anion exchange membrane (AEM) used in ECaB experiments was selective against  $\text{SO}_4^{2-}$  migration and rejected cation migration. Fig. S31 shows predicted equilibrium conditions for DD as a function of feed to receiving solution volume ratios.

379

#### 1. Mass balance

$$C_{i,FS,0}V_{FS} + C_{i,RS,0}V_{RS} = C_{i,FS,eq}V_{FS} + C_{i,RS,eq}V_{RS} \quad (\text{Equation S6.1.1})$$

382

#### 2. Electroneutrality

384

$$\sum_i z_i(C_{i,FS,0}V_{FS}) = \sum_i z_i(C_{i,FS,eq}V_{FS})$$

(Equation S6.1.2)

385

$$\sum_i z_i(C_{i,RS,0}V_{RS}) = \sum_i z_i(C_{i,RS,eq}V_{RS})$$

(Equation S6.1.3)



386

### 387 3. Solution phase electrochemical potential equations for Donnan equilibrium

388 
$$\bar{\mu}_{i,FS, equil.} = \bar{\mu}_{i,RS, equil.} \quad (\text{Equation S6.1.4})$$

389 
$$\mu_i^0 + RT \ln a_{i,FS, equil.} + z_i F \psi_{FS, equil.} = \mu_i^0 + RT \ln a_{i,RS, equil.} + z_i F \psi_{RS, equil.} \quad (\text{Equation S6.1.5})$$

390 Rearranging Equation S6.1.5 yields an equality between the electrochemical potential difference  
 391 arising from the activity of each ion  $i$  in feed and receiving streams, and the electrochemical potential  
 392 difference arising from the electric potential difference across the membrane.

393 
$$z_i F \psi_{FS, equil.} - z_i F \psi_{RS, equil.} = RT \ln a_{i,RS, equil.} - RT \ln a_{i,FS, equil.} \quad (\text{Equation S6.1.6})$$

394 Rearranging Equation S6.1.6 yields an equality between the electric potential difference across the ion  
 395 exchange membrane and the solution phase electrochemical potential difference.

396 
$$\psi_{FS, equil.} - \psi_{RS, equil.} = \frac{RT}{z_i F} \ln \left( \frac{a_{i,RS, equil.}}{a_{i,FS, equil.}} \right) \quad (\text{Equation S6.1.7})$$

397 Making the approximation that the electric potential difference experienced by each ion  $i$  in the system is  
 398 the same, the right hand side of Equation S6.1.7 can be used to equate electrochemical potentials of dissimilar ions.

399 For our example, the electrochemical potentials of  $\text{Cl}^-$  and  $\text{NO}_3^-$  can be equated as in Equations S6.1.8 and S6.1.9.

400 
$$\frac{RT}{-1 * F} \ln \left( \frac{a_{\text{Cl}^-, RS, equil.}}{a_{\text{Cl}^-, FS, equil.}} \right) = \frac{RT}{-1 * F} \ln \left( \frac{a_{\text{NO}_3^-, RS, equil.}}{a_{\text{NO}_3^-, FS, equil.}} \right) \quad (\text{Equation S6.1.8})$$

401 
$$\ln \left( \frac{a_{\text{Cl}^-, RS, equil.}}{a_{\text{Cl}^-, FS, equil.}} \right) = \ln \left( \frac{a_{\text{NO}_3^-, RS, equil.}}{a_{\text{NO}_3^-, FS, equil.}} \right) \quad (\text{Equation S6.1.9})$$

402 The activities used in Donnan equilibrium equations were considered for both an ideal model and a Pitzer  
 403 model based on the concentration of ions in the catholyte.<sup>8-11</sup>

404 For ideal model:  $a_i = C_i[M]$  (Equation S6.1.10)

405 For Pitzer model:  $a_i = \gamma_i C_i[M]$  (Equation S6.1.11)

406

407

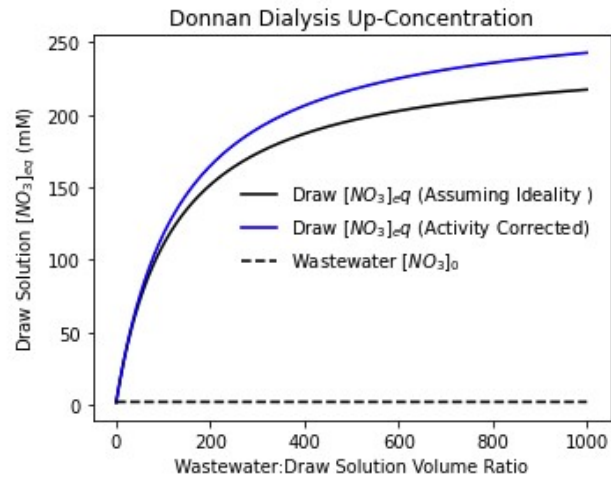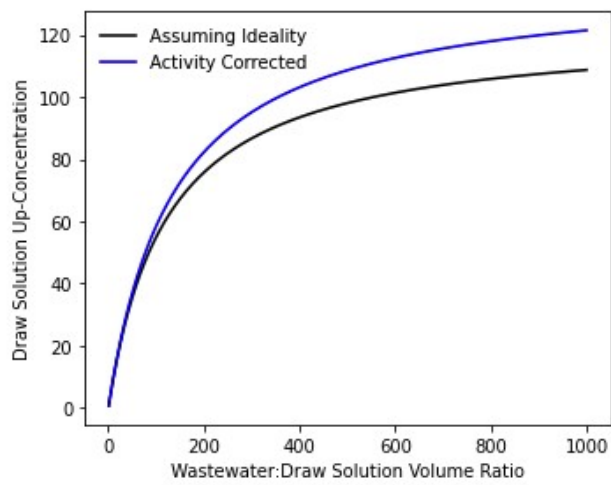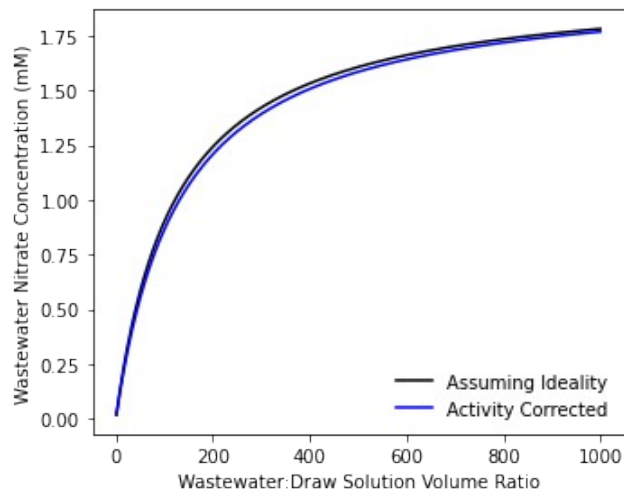

408

409

410 Fig. S33. Equilibrium conditions for Donnan dialysis with secondary effluent wastewater feed and 1 M KCl  
411 receiving solution.

## 412 Section S7: ECaB process engineering and targets

### 413 Section S7.1: Subunit engineered ECaB performance

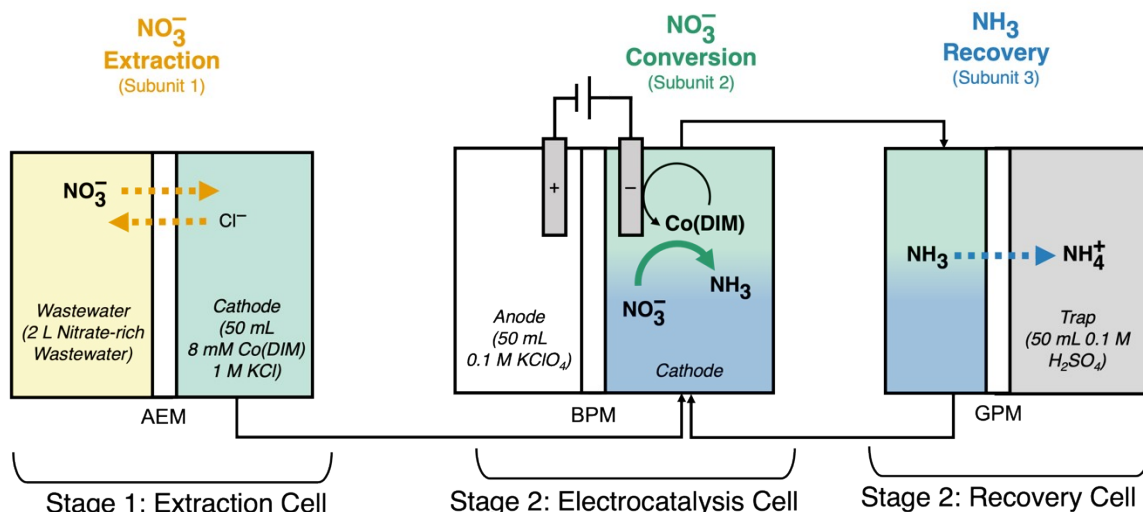

414

415 Fig. S34. Subunit engineered ECaB configuration used to demonstrate improved extraction and conversion  
 416 rates. To improve extraction from proof-of-concept, we used 2 L (increased from 200 mL) of wastewater  
 417 (to increase up-concentration) and a commercial serpentine flow field electrolyzer (to reduce mass transport  
 418 limitations). The resulting catholyte was used in the same commercial electrolyzer to perform Co(DIM)-  
 419 mediated  $\text{NO}_3\text{RR}$ . TAN recovery was performed in parallel with nitrate conversion using the same  
 420 experimental setup as in proof-of-concept.

421

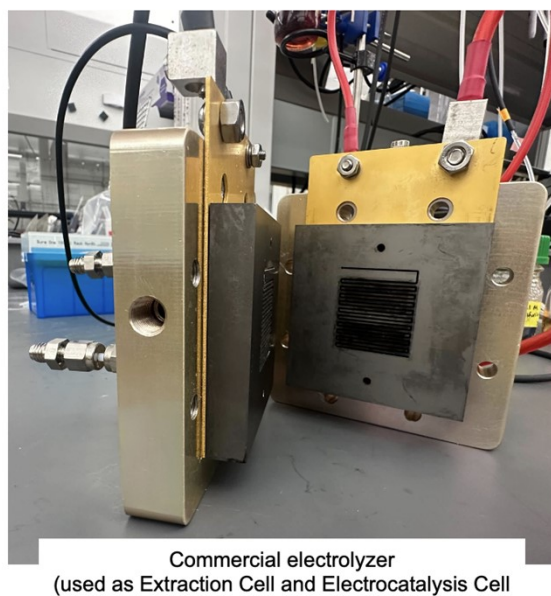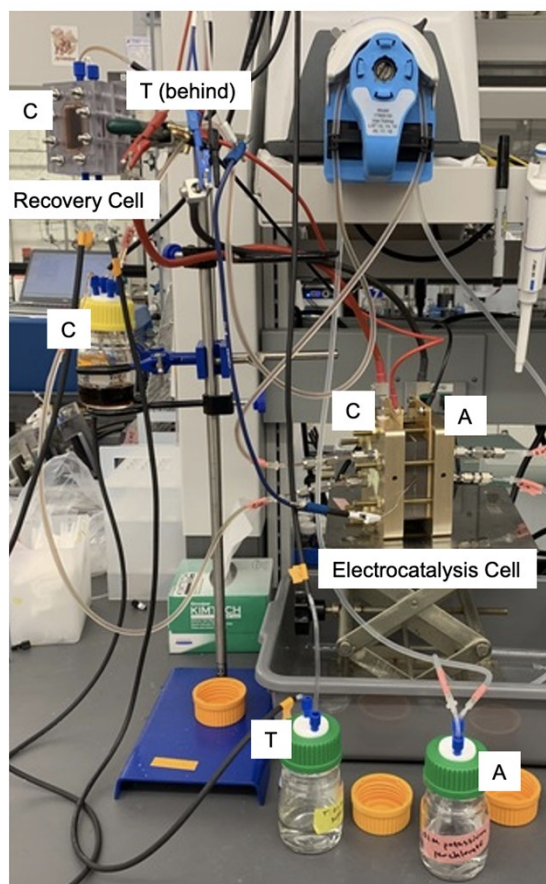

422

423 Fig. S35. Photos of the commercial electrolyzer (left) and the electrocatalysis cell and recovery cell in  
424 operation (right). Catholyte (C), anolyte (A), and trap (T) chambers and recirculation bottles are labeled.

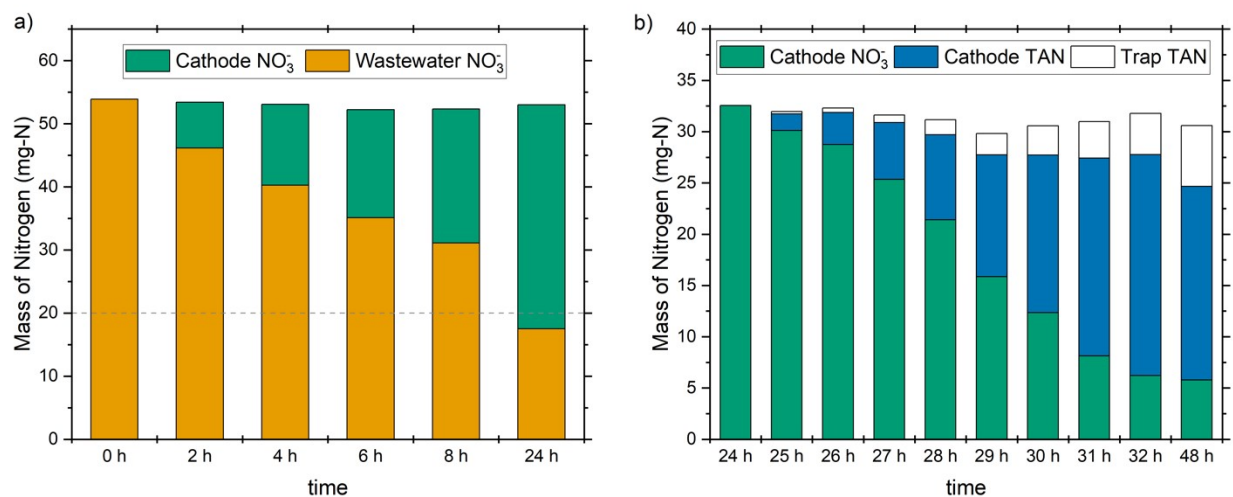

425

426 Fig. S36. Nitrogen mass balance for subunit engineered ECaB (a) Donnan dialysis nitrate extraction and  
 427 (b) Co(DIM)-mediated  $\text{NO}_3\text{RR}$  (nitrate conversion and TAN production) of the resulting catholyte. The  
 428 dashed horizontal line in panel (a) describes the mass of nitrogen that must be removed from the wastewater  
 429 to achieve an effluent concentration of 10 mg-N/L; subunit engineered ECaB was able to achieve this  
 430 concentration in 24 h with 2 L of wastewater feed. 67.5% of nitrate was extracted in 24 h, and 80.8% of the  
 431 extracted nitrate was converted to TAN in 8 h of CPE.

432

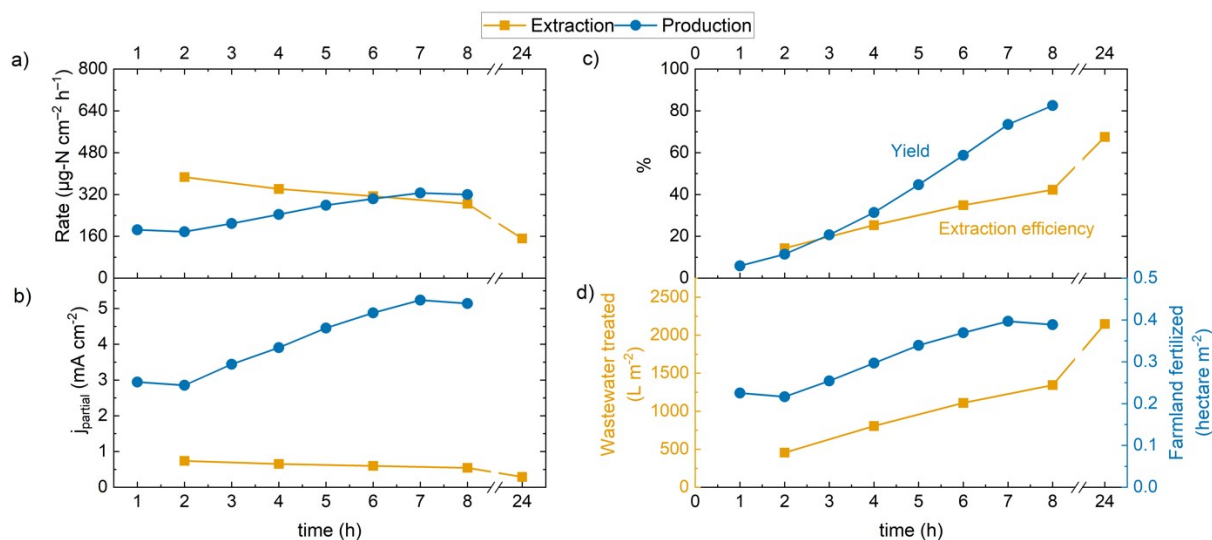

433

434 Fig. S37. Rates of nitrate extraction (orange) and TAN production (green) expressed as (a) flux of nitrogen  
 435 and (b) partial current density. In Panel (b), extraction partial current density is an effective ionic current  
 436 density of nitrate crossing the AEM from wastewater to catholyte (balanced by an equal and opposite flux  
 437 of chloride crossing the AEM from catholyte to wastewater); no external current was applied during  
 438 extraction. (c) Nitrate extraction efficiency and TAN yield. (d) Area-normalized volume of wastewater  
 439 treated and farmland serviced with  $(\text{NH}_4)_2\text{SO}_4$  fertilizer. Farmland serviced was calculated by assuming a  
 440 rate of  $72 \text{ kg-N hectare}^{-1} \text{ year}^{-1}$ : the average fertilizer application rate of crops in the United States.<sup>12</sup>

441

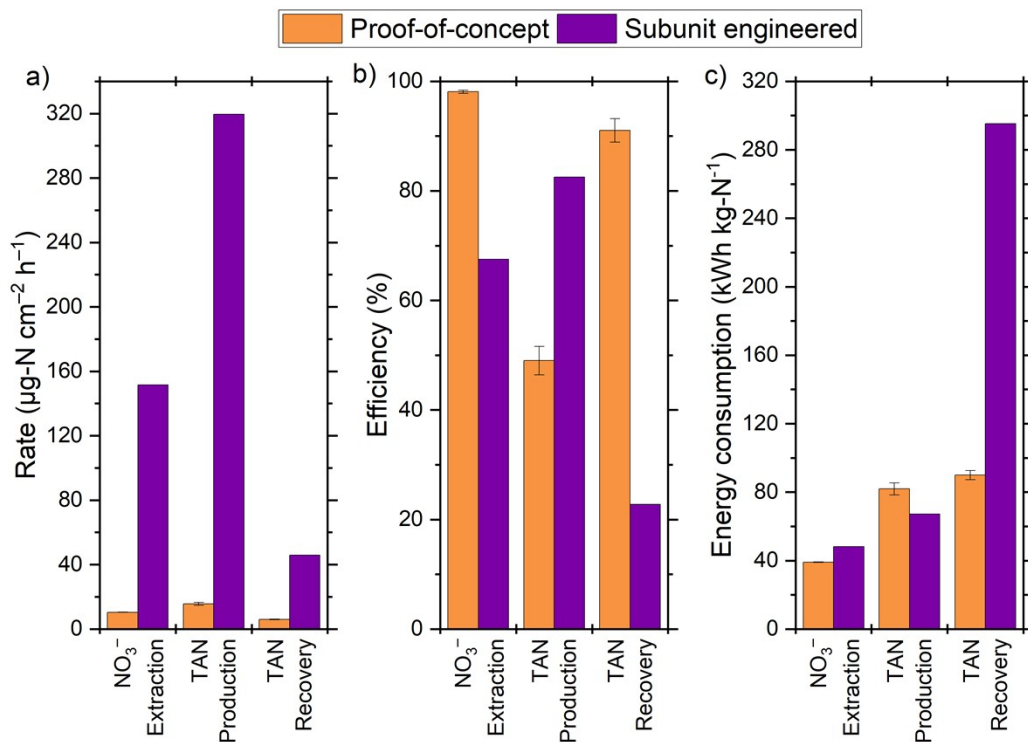

442

443 Fig. S38. (a) Rates, (b) efficiencies, and (c) energy consumption of nitrate extraction, TAN production, and  
 444 TAN recovery in proof-of-concept ECaB (orange) and subunit engineered ECaB (purple). These data are  
 445 the same that appear in Extended Data Tables 1, 3, and 4. Error bars represent ± one standard deviation  
 446 from triplicate experiments (n=3) for proof-of-concept ECaB. Data points for subunit engineered ECaB do  
 447 not have error bars because only one experiment was performed.

448

## 449 Section S7.2: Simplified cost assessment

450 Our cost assessment used the flux of  $\text{NO}_3^-$  from a municipal wastewater treatment plant processing  
 451  $10^7 \text{ gal}_{\text{wastewater}} \text{ day}^{-1}$  (the size of a large municipal wastewater treatment facility)<sup>13</sup> with 28 mg- $\text{NO}_3\text{-N L}^{-1}$   
 452 as the basis for electricity consumption (a total  $\text{NO}_3\text{RR}$  current to convert all nitrate to TAN), chemical  
 453 inputs ( $\text{NaCl}$  for nitrate extraction and  $\text{H}_2\text{SO}_4$  for TAN recovery), and revenue ( $(\text{NH}_4)_2\text{SO}_4$  fertilizer sales).  
 454  $\text{NO}_3\text{RR}$  overpotential ( $\eta_{\text{NO}_3\text{RR}}$ ) was calculated using the standard reduction potential of  $\text{NO}_3\text{RR}$  to ammonia  
 455  $(+0.7 \text{ V}_{\text{RHE}})^{14}$  and the Nernst equation assuming a steady state pH of 10 to facilitate TAN recovery by  
 456 membrane stripping. Total charge required was calculated assuming a removal efficiency of 64.2% such  
 457 that the effluent concentration was 10 mg- $\text{NO}_3\text{-N L}^{-1}$ . OER overpotential ( $\eta_{\text{OER}}$ ) was calculated using the  
 458 standard reduction potential of OER  $(+1.23 \text{ V}_{\text{RHE}})$  and the Nernst equation assuming a steady state pH of  
 459 1.5 observed in subunit engineered ECaB experiment. Based on the  $\text{FE}_{\text{TAN}}$ ,  $\eta_{\text{NO}_3\text{RR}}$ , and  $\eta_{\text{OER}}$ , the required  
 460 energy consumption was calculated. Multiplying this value by the electricity cost yielded the operational  
 461 expenditure (OpEx) for electricity. We also calculated the electricity costs associated with pumping  
 462 according to Tarpeh et al.<sup>15</sup>

463

$$464 \quad \text{Pumping energy} = \frac{1}{\text{mol TAN}_{\text{produced}}} \left( \frac{t\gamma V H^*}{n_{\text{pump}}^* n_{\text{motor}}^*} \right) \quad \text{Equation S7.2.1}$$

465

466 In equation S7.2.1,  $t$  is the duration of pumping wastewater through the extraction cell (24 hours),  
 467  $\gamma$  is the specific weight of water ( $9.8 \text{ kN m}^{-3}$ ),  $V$  is the flow rate ( $57 \text{ mL min}^{-1}$ ),  $H^*$  is the pump head determined  
 468 by the length of the serpentine flow path in the extraction cell required to treat  $10^7 \text{ gal}_{\text{wastewater}} \text{ day}^{-1}$  (  
 469  $1.2 \times 10^7 \text{ m}$ ),  $n_{\text{pump}}^*$  is the pump efficiency (assumed 0.4), and  $n_{\text{motor}}^*$  is the motor efficiency (assumed 0.95).  
 470 We subtracted this electricity OpEx value and chemical inputs OpEx value from the revenue of recovered  
 471  $(\text{NH}_4)_2\text{SO}_4$  fertilizer ( $\$2.77 \text{ kg-N}^{-1}$ ) to establish a yearly cash flow.<sup>16</sup> To correct for inflation, the yearly  
 472 cash flow was modified by Equation S7.2.2:



$$\text{Cash flow}(\text{year } i) = (\text{Revenue}(\text{year } i) - \text{Electricity costs}(\text{year } i) - \text{Chemical costs}(\text{year } i) - \dots \text{CapEx}(\text{year } i)) \times 1.03^i$$

Equation

The capital expenditure (CapEx) budget was calculated as the net present value of the cash flow over a ten year reactor lifetime with a discount rate of 10%. The entire CapEx budget was spent (i.e., the unit process is a net zero cost) to establish a total surface area of reactor components (Fig. 6a). Dividing the CapEx budget by the sum of the area-normalized prices of Co(DIM), anode material, and cell hardware (graphite for flow field blocks) yielded a total reactor geometric surface area. Dividing the product of total current and  $FE_{\text{TAN}}$  by the total reactor geometric surface area yielded a TAN partial current density target.

We did not consider the costs of labor, the revenue from water recovery, nor potential regulatory fines from environmental nitrate discharge. Additionally, a cost of electricity above  $\text{¢}4.08 \text{ kWh}^{-1}$  forced the process to be a net cost. For this reason, we considered  $\text{¢}3 \text{ kWh}^{-1}$ , motivated by the U.S. Department of Energy's 2030 SunShot target.<sup>7</sup> Table S3 outlines parameters used for the cost assessment.

Table S3. OpEx and CapEx used in simplified cost assessment of ECaB.

| Expenditure                           | Parameter                                       | Value                                                                  | Source        |
|---------------------------------------|-------------------------------------------------|------------------------------------------------------------------------|---------------|
| OpEx – NO <sub>3</sub> RR electricity | Electricity cost                                | $\text{¢}3 \text{ kWh}^{-1}$                                           | <sup>7</sup>  |
| OpEx – Chemical inputs                | Sodium chloride (NaCl)                          | $\text{¢}6.67 \text{ kg}^{-1}$                                         | <sup>17</sup> |
|                                       | Sulfuric acid (H <sub>2</sub> SO <sub>4</sub> ) | $\text{¢}7.6 \text{ kg}^{-1}$                                          | <sup>17</sup> |
| OpEx – Pumping electricity            | Electricity cost                                | $\text{¢}3 \text{ kWh}^{-1}$                                           | <sup>15</sup> |
| CapEx – Co(DIM)                       | Cobalt acetate                                  | $\text{¢}23.7 \text{ g}^{-1}$                                          | Sigma         |
|                                       | 1,2-bis(3-aminopropylamino)ethane               | $\text{¢}40.4 \text{ mL}^{-1}$                                         |               |
|                                       | Biacetyl                                        | $\text{¢}33.6 \text{ mL}^{-1}$                                         |               |
|                                       | Methanol                                        | $\$11.90 \text{ L}^{-1}$                                               |               |
|                                       | Perchloric acid (70 wt%)                        | $\text{¢}15.6 \text{ mL}^{-1}$                                         |               |
|                                       | Hydrobromic acid (48 wt%)                       | $\text{¢}12.9 \text{ mL}^{-1}$                                         |               |
|                                       | <b>Total cost</b>                               | $\$3.97 \text{ g}_{\text{Co(DIM)}}^{-1} (\text{¢}8.6 \text{ cm}^{-2})$ |               |
| CapEx – Anode                         | Platinized titanium mesh                        | $\$1.25 \text{ cm}^{-2}$                                               | Fuel Cell     |

|                       |                                |                                                                                                          |                                              |
|-----------------------|--------------------------------|----------------------------------------------------------------------------------------------------------|----------------------------------------------|
|                       |                                |                                                                                                          | Store                                        |
|                       | Nickel foil                    | $\$7.85 \text{ cm}^{-2}$                                                                                 | McMaster                                     |
| CapEx – Membranes     | Anion exchange membrane (AEM)  | $\$4.43 \text{ cm}^{-2}$<br>( $0.16 \text{ cm}_{\text{AEM}}^2 \text{ cm}_{\text{flow path}}^{-1}$ )      | Selemion                                     |
|                       | Cation exchange membrane (CEM) | $\$2.95 \text{ cm}^{-2}$                                                                                 | Selemion                                     |
|                       | Gas-permeable membrane (GPM)   | $\$0.54 \text{ cm}^{-2}$                                                                                 | Parker-Hannifin                              |
| CapEx – Cell hardware | Graphite material              | $\$1.8 \text{ cm}^{-3}$<br>( $5.14 \text{ cm}_{\text{graphite}}^3 \text{ cm}_{\text{flow field}}^{-2}$ ) | <a href="#">link</a><br><a href="#">link</a> |

488

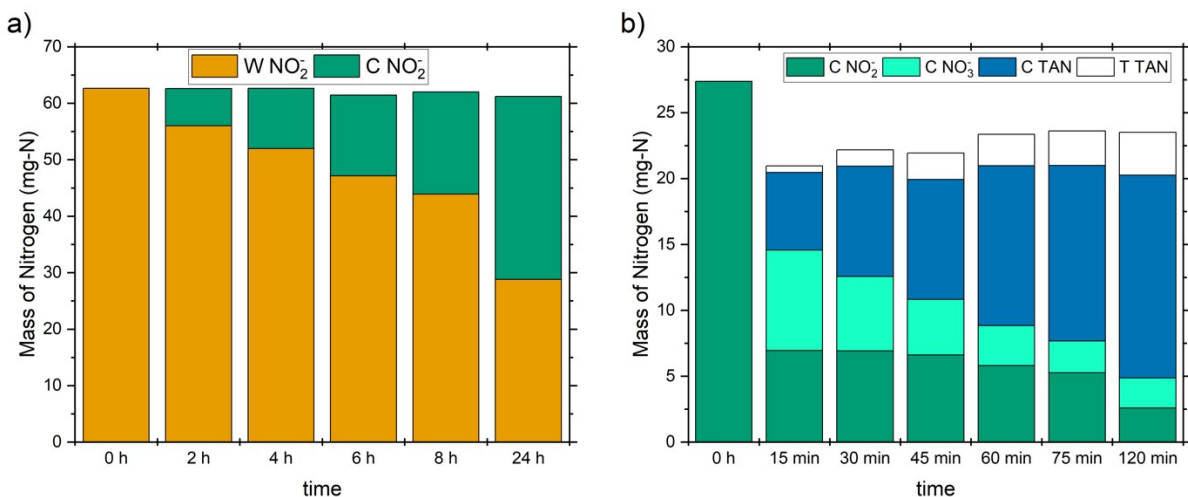

490

491 Fig. S39. Nitrogen mass balance for ECaB with Co(DIM)-mediated NO<sub>2</sub>RR. (a) Nitrogen mass balance for  
 492 Donnan dialysis extraction with 2 L of simulated nitrite-bearing wastewater (W; 6.2 mM NaCl, 2 mM  
 493 NaNO<sub>2</sub>) and 50 mL of catholyte (C; 1 M KCl, 8 mM Co(DIM)). The extraction cell configuration and  
 494 operation were the same as for subunit engineered ECaB with real wastewater. (b) Nitrogen mass balance  
 495 for Co(DIM)-mediated nitrite conversion to TAN with concurrent TAN recovery. The conversion cell and  
 496 trap cell configuration and operation were the same as for the subunit engineered ECaB with real  
 497 wastewater, except that the constant potential -1.05 V vs. Ag/AgCl was applied for 15 minute increments  
 498 instead of 1 h increments because Co(DIM)-mediated NO<sub>2</sub>RR is significantly faster than Co(DIM)-  
 499 mediated NO<sub>3</sub>RR.

500

501

502 Table S4. Efficiency, rate, and energy comparison to literature: Nitrate extraction

| ref        | Wastewater                                                                        | Extraction mechanism                                                                                                       | Nitrate extraction efficiency ( $\eta_{NO_3^- \text{ Extraction}}$ ) | Nitrate extraction rate                  |                                         | Nitrate extraction energy consumption   |
|------------|-----------------------------------------------------------------------------------|----------------------------------------------------------------------------------------------------------------------------|----------------------------------------------------------------------|------------------------------------------|-----------------------------------------|-----------------------------------------|
|            |                                                                                   |                                                                                                                            |                                                                      | $\mu g N cm^{-2} h^{-1}$                 | $mg N L^{-1} day^{-1}$                  | kWh kg-N <sup>-1</sup>                  |
| *This work | Secondary effluent (2 mM nitrate)                                                 | Donnan dialysis (1 M KCl receiver solution)                                                                                | 81.3 ± 3.3% at 24 h<br>98.1 ± 0.3% at 96 h                           | 34.6 ± 1.7 at 24 h<br>10.4 ± 0.1 at 96 h | 23.0 ± 1.3 at 24 h<br>7.8 ± 0.1 at 96 h | 0 (39.0 ± 0.2 considering all subunits) |
| *This work | Secondary effluent (2 mM nitrate)                                                 | Donnan dialysis (1 M KCl receiver solution)                                                                                | 67.5% at 24 h                                                        | 151.6 at 24 h                            | 18.2 at 24 h                            | 0 (48.2 considering all subunits)       |
| 18         | Secondary effluent (2 mM nitrate)                                                 | n/a                                                                                                                        |                                                                      |                                          |                                         |                                         |
| 19         | Agricultural tile drainage (0.27 mM nitrate)                                      | Electrodeionization with Polyaniline-Co <sub>3</sub> O <sub>4</sub> -carbon nanotube slurry coated on Ti mesh as electrode | n.r.                                                                 | n.r.                                     | n.r.                                    | 92.2                                    |
| 20         | 25 mM NaNO <sub>3</sub> in 0.1 M Na <sub>2</sub> SO <sub>4</sub>                  | n/a                                                                                                                        |                                                                      |                                          |                                         |                                         |
|            | Printing wastewater (14.9 mM nitrate)                                             | n/a                                                                                                                        |                                                                      |                                          |                                         |                                         |
| 21         | 25 mM NaNO <sub>3</sub> in 0.5 M Na <sub>2</sub> SO <sub>4</sub>                  | n/a                                                                                                                        |                                                                      |                                          |                                         |                                         |
|            | Pharmaceutical industry wastewater (31.1 ± 1.1 mM nitrate)                        | n/a                                                                                                                        |                                                                      |                                          |                                         |                                         |
| 22         | Oil refining & chemical catalyst manufacturing wastewater (36.1 ± 0.9 mM nitrate) | n/a                                                                                                                        |                                                                      |                                          |                                         |                                         |
| 23         | 7.14 mM KNO <sub>3</sub>                                                          | Electrodialysis, 5 cm <sup>2</sup> (2 M KNO <sub>3</sub> receiver solution)                                                | 75.0%                                                                | 542.4                                    | n.r.                                    | n.r.                                    |

503 \*Equations used to calculate ECaB performance metrics in this work are provided in Section S.5.1.

504 Table S5. Efficiency, rate, and energy comparison to literature: Nitrate conversion by NO<sub>3</sub>RR

| ref        | Wastewater                                                                        | Electrode/catalyst<br>(Geometric surface areas)                                      | Nitrate conversion<br>( $\chi_{NO_3^-}$ Conversion) | FE to TAN                                 | Nitrate conversion rate                  |                                          | Nitrate conversion energy consumption<br>kWh kg-N <sup>-1</sup> |
|------------|-----------------------------------------------------------------------------------|--------------------------------------------------------------------------------------|-----------------------------------------------------|-------------------------------------------|------------------------------------------|------------------------------------------|-----------------------------------------------------------------|
|            |                                                                                   |                                                                                      |                                                     |                                           | $\mu g\ N\ cm_{geometric}^{-2}\ h^{-1}$  | $mg\ N\ L^{-1}\ day^{-1}$                |                                                                 |
| *This work | Secondary effluent (2 mM nitrate concentrated to 5.8 mM)                          | Co(DIM), 5.4 cm <sup>2</sup> glassy carbon plate cathode                             | 62.0 ± 1.0% at 96 h (30 h cumulative CPE)           | 57.4 ± 0.2% at 96 h (30 h cumulative CPE) | 20.0 ± 0.2 at 96 h (30 h cumulative CPE) | 59.1 ± 1.9 at 96 h (30 h cumulative CPE) | 64.7 ± 0.4 cumulative at 96 h (30 h CPE)                        |
| *This work | Secondary effluent (2 mM nitrate concentrated to 54 mM)                           | Co(DIM), 10 cm <sup>2</sup> graphite serpentine flow field                           | 80.8 at 48 h (8 h cumulative CPE)                   | 62.9 % at 48 h (8 h cumulative CPE)       | 329.0 at 48 h (8 h cumulative CPE)       | 2193.5 at 48 h (8 h cumulative CPE)      | 66.6 cumulative at 48 h (8 h CPE)                               |
| 18         | Secondary effluent (2 mM nitrate)                                                 | Co(DIM), 64 cm <sup>2</sup> 316 SS mesh cathode                                      | 70.5 ± 2.7% at 42 h                                 | 10-15%                                    | 1.9                                      | 21                                       | n.r.                                                            |
| 19         | Agricultural tile drainage (0.27 mM nitrate concentrated to 2.45 mM)              | Polyaniline-Co <sub>3</sub> O <sub>4</sub> -carbon nanotube slurry coated on Ti mesh | n.r.                                                | 28%                                       | n.r.                                     | n.r.                                     | n.r.                                                            |
| 20         | 25 mM NaNO <sub>3</sub> in 0.1 M Na <sub>2</sub> SO <sub>4</sub>                  | Electrodeposited Co on Ti mesh (16 cm <sup>2</sup> )                                 | 100% at 3 h                                         | 43.7%                                     | n.r.                                     | n.r.                                     | n.r.                                                            |
|            | Printing wastewater (14.9 mM nitrate)                                             | Electrodeposited Co on Ti mesh (16 cm <sup>2</sup> )                                 | 100% at 3 h                                         | n.r.                                      | n.r.                                     | n.r.                                     | n.r.                                                            |
| 21         | 25 mM NaNO <sub>3</sub> in 0.5 M Na <sub>2</sub> SO <sub>4</sub>                  | CuO@Cu foam                                                                          | ~100%                                               | 49.2%                                     | 1846 ± 46                                | n.r.                                     | n.r.                                                            |
|            | Pharmaceutical industry wastewater (31.1 ± 1.1 mM nitrate)                        | CuO@Cu foam                                                                          | >96.9%                                              | n.r.                                      | 1817 ± 75                                | n.r.                                     | n.r.                                                            |
| 22         | Oil refining & chemical catalyst manufacturing wastewater (36.1 ± 0.9 mM nitrate) | Ni foam (1.4 m <sup>2</sup> )                                                        | 95%                                                 | n.r.                                      | n.r.                                     | n.r.                                     | n.r.                                                            |

|    |                                                  |                                          |      |       |      |      |      |
|----|--------------------------------------------------|------------------------------------------|------|-------|------|------|------|
| 23 | <i>1.12 M KNO<sub>3</sub> in 60 wt% NaOH/KOH</i> | Ni mesh (100 cm <sup>2</sup> ),<br>80 °C | n.r. | 70.4% | n.r. | n.r. | n.r. |
|----|--------------------------------------------------|------------------------------------------|------|-------|------|------|------|

505 \*Equations used to calculate ECaB performance metrics in this work are provided in Section S.5.1.

506

507 Table S6. Efficiency, rate, and energy comparison to literature: TAN production by NO<sub>3</sub>RR

| ref        | Wastewater                                                                        | Electrode/catalyst<br>(Geometric surface areas)                                      | NO <sub>3</sub> RR product                                         | TAN yield ( $Y_{TAN}$ )                   | TAN yield rate                           |                                          | TAN production energy consumption                         |
|------------|-----------------------------------------------------------------------------------|--------------------------------------------------------------------------------------|--------------------------------------------------------------------|-------------------------------------------|------------------------------------------|------------------------------------------|-----------------------------------------------------------|
|            |                                                                                   |                                                                                      |                                                                    |                                           | $\mu g N cm^{-2} h^{-1}$                 | $mg N L^{-1} day^{-1}$                   | kWh kg-N <sup>-1</sup>                                    |
| *This work | Secondary effluent (2 mM nitrate concentrated to 5.8 mM)                          | Co(DIM), 5.4 cm <sup>2</sup> glassy carbon plate cathode                             | TAN in 1 M KCl                                                     | 49.0 ± 2.6% at 96 h (30 h cumulative CPE) | 15.7 ± 0.9 at 96 h (30 h cumulative CPE) | 46.2 ± 0.8 at 96 h (30 h cumulative CPE) | 81.9 ± 3.5 cumulative at 96 h (30 h CPE)                  |
| *This work | Secondary effluent (2 mM nitrate concentrated to 54 mM)                           | Co(DIM), 10 cm <sup>2</sup> graphite serpentine flow field                           | TAN in 1 M KCl                                                     | 82.5 at 48 h (8 h cumulative CPE)         | 319.6 at 48 h (8 h cumulative CPE)       | 2130.6 at 48 h (8 h cumulative CPE)      | 67.2 cumulative at 48 h (8 h CPE)                         |
| 18         | Secondary effluent (2 mM nitrate)                                                 | Co(DIM), 64 cm <sup>2</sup> 316 SS mesh cathode                                      | TAN in secondary effluent                                          | n.r.                                      | n.r.                                     | n.r.                                     | n.r.                                                      |
| 19         | Agricultural tile drainage (0.27 mM nitrate concentrated to 2.45 mM)              | Polyaniline-Co <sub>3</sub> O <sub>4</sub> -carbon nanotube slurry coated on Ti mesh | TAN in 0.1 M NaCl                                                  | n.r.                                      | 89.0                                     | n.r.                                     | 159.1 for NO <sub>3</sub> RR (251.3 including extraction) |
| 20         | 25 mM NaNO <sub>3</sub> in 0.1 M Na <sub>2</sub> SO <sub>4</sub>                  | Electrodeposited Co on Ti mesh (16 cm <sup>2</sup> )                                 | TAN in NaNO <sub>3</sub> and 0.1 M Na <sub>2</sub> SO <sub>4</sub> | n.r.                                      | n.r.                                     | n.r.                                     | n.r.                                                      |
|            | Printing wastewater (14.9 mM nitrate)                                             | Electrodeposited Co on Ti mesh (16 cm <sup>2</sup> )                                 | TAN in printing wastewater                                         | n.r.                                      | n.r.                                     | n.r.                                     | n.r.                                                      |
| 21         | 25 mM NaNO <sub>3</sub> in 0.5 M Na <sub>2</sub> SO <sub>4</sub>                  | CuO@Cu foam                                                                          | TAN in NaNO <sub>3</sub> and 0.5 M Na <sub>2</sub> SO <sub>4</sub> | n.r.                                      | n.r.                                     | n.r.                                     | n.r.                                                      |
|            | Pharmaceutical industry wastewater (31.1 ± 1.1 mM nitrate)                        | CuO@Cu foam                                                                          | TAN in NaNO <sub>3</sub> and 0.5 M Na <sub>2</sub> SO <sub>4</sub> | n.r.                                      | n.r.                                     | n.r.                                     | n.r.                                                      |
| 22         | Oil refining & chemical catalyst manufacturing wastewater (36.1 ± 0.9 mM nitrate) | Ni foam (1.4 m <sup>2</sup> )                                                        | TAN in manufacturing wastewater                                    | n.r.                                      | n.r.                                     | n.r.                                     | n.r.                                                      |

|    |                                                  |                                       |                        |      |       |      |                                                           |
|----|--------------------------------------------------|---------------------------------------|------------------------|------|-------|------|-----------------------------------------------------------|
| 23 | <i>1.12 M KNO<sub>3</sub> in 60 wt% NaOH/KOH</i> | Ni mesh (100 cm <sup>2</sup> ), 80 °C | TAN in 60 wt% NaOH/KOH | n.r. | 11494 | n.r. | 83.4 for NO <sub>3</sub> RR (does not include extraction) |
|----|--------------------------------------------------|---------------------------------------|------------------------|------|-------|------|-----------------------------------------------------------|

508 \*Equations used to calculate ECaB performance metrics in this work are provided in Section S.5.1.



509 Table S7. Efficiency, rate, and energy comparison to literature: TAN recovery

| ref        | Wastewater                                                           | Recovery mechanism                                                                    | Recovered product                                                                                        | TAN recovery efficiency ( $\eta_{TAN Recovery}$ )      | TAN recovery rate        |                        | TAN recovery energy consumption<br>kWh kg-N <sup>-1</sup> |
|------------|----------------------------------------------------------------------|---------------------------------------------------------------------------------------|----------------------------------------------------------------------------------------------------------|--------------------------------------------------------|--------------------------|------------------------|-----------------------------------------------------------|
|            |                                                                      |                                                                                       |                                                                                                          |                                                        | $\mu g N cm^{-2} h^{-1}$ | $mg N L^{-1} day^{-1}$ |                                                           |
| *This work | Secondary effluent (2 mM nitrate concentrated to 5.8 mM)             | Electrochemical basification + Membrane stripping (5.4 cm <sup>2</sup> membrane area) | (NH <sub>4</sub> ) <sub>2</sub> SO <sub>4,aq</sub> in 0.1 M H <sub>2</sub> SO <sub>4,aq</sub>            | 91.0 ± 2.1% at 96 h (*Overall N recovery: 42.6 ± 1.4%) | 6.0 ± 0.2 at 96 h        | 18.1 ± 0.2 at 96 h     | 90.0 ± 2.7 at 96 h (cumulative)                           |
| *This work | Secondary effluent (2 mM nitrate concentrated to 54 mM)              | Electrochemical basification + Membrane stripping (5.4 cm <sup>2</sup> membrane area) | (NH <sub>4</sub> ) <sub>2</sub> SO <sub>4,aq</sub> in 0.1 M H <sub>2</sub> SO <sub>4,aq</sub>            | 22.8% at 48 h (*Overall N recovery: 11.0%)             | 45.8 at 48 h             | 169.6 at 48 h          | 295.3 at 48 h (cumulative)                                |
| 18         | Secondary effluent (2 mM nitrate)                                    | Electrochemical basification + Membrane stripping (64 cm <sup>2</sup> membrane area)  | (NH <sub>4</sub> ) <sub>2</sub> SO <sub>4,aq</sub> in 0.1 M H <sub>2</sub> SO <sub>4,aq</sub>            | Overall N recovery: 53.6 ± 2.8%                        | 1.3                      | 15.9                   | 340 ± 30 (cumulative)                                     |
| 19         | Agricultural tile drainage (0.27 mM nitrate concentrated to 2.45 mM) | n/a                                                                                   |                                                                                                          |                                                        |                          |                        |                                                           |
| 20         | 25 mM NaNO <sub>3</sub> in 0.1 M Na <sub>2</sub> SO <sub>4</sub>     | Electrochemical basification + Membrane stripping (16 cm <sup>2</sup> membrane area)  | (NH <sub>4</sub> ) <sub>2</sub> SO <sub>4,aq</sub> in 1 M H <sub>2</sub> SO <sub>4,aq</sub>              | Overall N recovery: 83.8% at 3 h                       | n.r.                     | n.r.                   | 155                                                       |
|            | Printing wastewater (14.9 mM nitrate)                                | Electrochemical basification + Membrane stripping (16 cm <sup>2</sup> membrane area)  | (NH <sub>4</sub> ) <sub>2</sub> SO <sub>4,aq</sub> in 1 M H <sub>2</sub> SO <sub>4,aq</sub>              | Overall N recovery: 86% at 3 h                         | n.r.                     | n.r.                   | n.r.                                                      |
| 21         | 25 mM NaNO <sub>3</sub> in 0.5 M Na <sub>2</sub> SO <sub>4</sub>     | Electrochemical basification + Membrane stripping (4 cm <sup>2</sup> membrane area)   | (NH <sub>4</sub> ) <sub>2</sub> SO <sub>4,aq</sub> in acidified 0.5 M Na <sub>2</sub> SO <sub>4,aq</sub> | Overall N recovery: ~100%                              | 733 ± 42                 | n.r.                   | 140.6 ± 13.7                                              |
|            | Pharmaceutical industry wastewater (31.1 ± 1.1 mM nitrate)           | Electrochemical basification + Membrane stripping (4 cm <sup>2</sup> membrane area)   | (NH <sub>4</sub> ) <sub>2</sub> SO <sub>4,aq</sub> in acidified 0.5 M Na <sub>2</sub> SO <sub>4,aq</sub> | n.r.                                                   | 916 ± 27                 | n.r.                   | n.r.                                                      |
| 22         | Oil refining & chemical catalyst manufacturing                       | n/a                                                                                   |                                                                                                          |                                                        |                          |                        |                                                           |

|    |                                                  |                       |                                                                                                                 |       |      |      |      |
|----|--------------------------------------------------|-----------------------|-----------------------------------------------------------------------------------------------------------------|-------|------|------|------|
|    | wastewater ( $36.1 \pm 0.9$ mM nitrate)          |                       |                                                                                                                 |       |      |      |      |
| 23 | <i>1.12 M KNO<sub>3</sub> in 60 wt% NaOH/KOH</i> | Carrier gas stripping | NH <sub>3,(aq)</sub> ,<br>NH <sub>4</sub> HCO <sub>3</sub> ,<br>(NH <sub>4</sub> ) <sub>2</sub> SO <sub>4</sub> | ~100% | n.r. | n.r. | n.r. |

510 \*Equations used to calculate ECaB performance metrics in this work are provided in Section S.5.

## 511 References

- 512 1 Solubility product constants, [https://www.engineeringtoolbox.com/solubility-product-equilibrium-](https://www.engineeringtoolbox.com/solubility-product-equilibrium-constant-ionic-solution-salt-Ksp-d_1952.html)  
513 [constant-ionic-solution-salt-Ksp-d\\_1952.html](https://www.engineeringtoolbox.com/solubility-product-equilibrium-constant-ionic-solution-salt-Ksp-d_1952.html), (accessed July 6, 2023).
- 514 2 A. Atrashkevich, A. S. Fajardo, P. Westerhoff, W. S. Walker, C. M. Sánchez-Sánchez and S. Garcia-  
515 Segura, *Water Research*, 2022, **225**, 119118.
- 516 3 S. Xu, D. C. Ashley, H.-Y. Kwon, G. R. Ware, C.-H. Chen, Y. Losovyj, X. Gao, E. Jakubikova and J.  
517 M. Smith, *Chem. Sci.*, 2018, **9**, 4950–4958.
- 518 4 A. Ch. Lazanas and M. I. Prodromidis, *ACS Meas. Sci. Au.*, DOI:10.1021/acsmesuresciau.2c00070.
- 519 5 A. J. Bard and L. R. Faulkner, *Electrochemical methods: fundamentals and applications*, Wiley, New  
520 York, 2nd ed., 2001.
- 521 6 J. Guo, P. Brimley, M. J. Liu, E. R. Corson, C. Muñoz, W. A. Smith and W. A. Tarpeh, *ACS*  
522 *Sustainable Chem. Eng.*, DOI:10.1021/acssuschemeng.3c01057.
- 523 7 W. J. Cole, B. A. Frew, P. J. Gagnon, J. Richards, Y. Sun, R. M. Margolis and M. A. Woodhouse,  
524 *SunShot 2030 for Photovoltaics (PV): Envisioning a Low-cost PV Future*, 2017.
- 525 8 H. T. Kim and W. J. Frederick, *J. Chem. Eng. Data*, 1988, **33**, 177–184.
- 526 9 K. S. Pitzer, *A thermodynamic model for aqueous solutions of liquid-like density*, Lawrence Berkeley  
527 Lab., CA (USA), 1987.
- 528 10 K. S. Pitzer, *Activity Coefficients in Electrolyte Solutions*, CRC Press, 2018.
- 529 11 K. S. Pitzer and J. J. Kim, *J. Am. Chem. Soc.*, 1974, **96**, 5701–5707.
- 530 12 USDA ERS - Fertilizer Use and Price, [https://www.ers.usda.gov/data-products/fertilizer-use-and-](https://www.ers.usda.gov/data-products/fertilizer-use-and-price.aspx)  
531 [price.aspx](https://www.ers.usda.gov/data-products/fertilizer-use-and-price.aspx), (accessed January 26, 2023).
- 532 13 *Science of The Total Environment*, 2017, **603–604**, 445–452.
- 533 14 Y. Wang, A. Xu, Z. Wang, L. Huang, J. Li, F. Li, J. Wicks, M. Luo, D.-H. Nam, C.-S. Tan, Y. Ding, J.  
534 Wu, Y. Lum, C.-T. Dinh, D. Sinton, G. Zheng and E. H. Sargent, *J. Am. Chem. Soc.*, 2020, **142**, 5702–  
535 5708.
- 536 15 W. A. Tarpeh, J. M. Barazesh, T. Y. Cath and K. L. Nelson, *Environ. Sci. Technol.*, 2018, **52**, 1453–  
537 1460.
- 538 16 A. Kogler, N. Sharma, D. Tiburcio, M. Gong, D. M. Miller, K. S. Williams, X. Chen and W. A.  
539 Tarpeh, *ACS Environ. Au.*, DOI:10.1021/acsenvironau.3c00058.
- 540 17 A. Kogler, N. Sharma, D. Tiburcio, M. Gong, D. M. Miller, K. S. Williams, X. Chen and W. A.  
541 Tarpeh, 2023.
- 542 18 M. J. Liu, D. M. Miller and W. A. Tarpeh, *Environ. Sci. Technol. Lett.*, 2023, **10**, 458–463.
- 543 19 K. Kim, A. Zagalskaya, J. L. Ng, J. Hong, V. Alexandrov, T. A. Pham and X. Su, *Nat Commun*, 2023,  
544 **14**, 823.
- 545 20 J. Gao, N. Shi, X. Guo, Y. Li, X. Bi, Y. Qi, J. Guan and B. Jiang, *Environ. Sci. Technol.*, 2021, **55**,  
546 10684–10694.
- 547 21 J. Gao, N. Shi, Y. Li, B. Jiang, T. Marhaba and W. Zhang, *Environ. Sci. Technol.*, 2022, **56**, 11602–  
548 11613.
- 549 22 W. Zheng, L. Zhu, Z. Yan, Z. Lin, Z. Lei, Y. Zhang, H. Xu, Z. Dang, C. Wei and C. Feng, *Environ. Sci.*  
550 *Technol.*, 2021, **55**, 13231–13243.
- 551 23 Y. Chen, P. Ammari-Azar, H. Liu, J. Lee, Y. Xi, M. J. Castellano, S. Gu and W. Li, *EES. Catal.*, 2023,  
552 **1**, 504–515.
- 553
